# Supplementary material for: Pyrosequencing of Antibiotic-Contaminated River Sediments Reveals High Levels of Resistance and Gene Transfer Elements
Source: PubMed Central journal article supplement (PMC3040208; doi:10.1371/journal.pone.0017038), 2011-02-16
Supplement: pone.0017038.s003.pdf [file pone.0017038.s003.pdf]

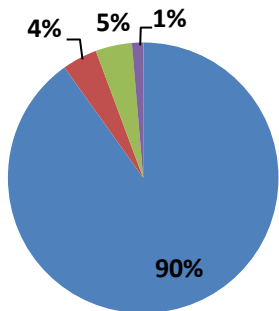

**Indian WWTP  
Downstream 1**

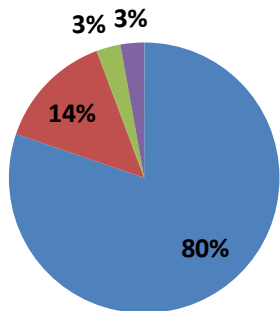

**Indian WWTP  
Downstream 2**

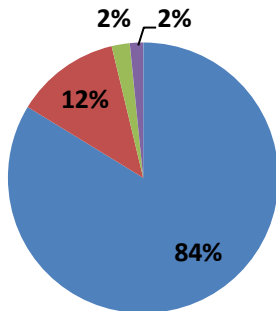

**Indian WWTP  
Downstream 3**

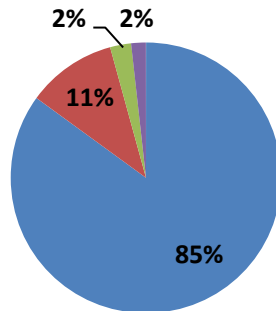

**Indian WWTP  
Discharge site**

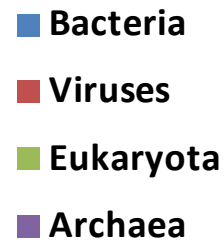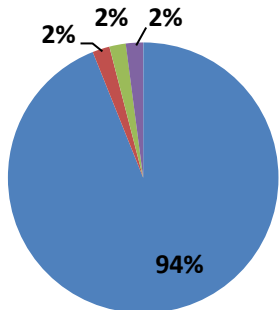

**Indian WWTP  
Upstream 1**

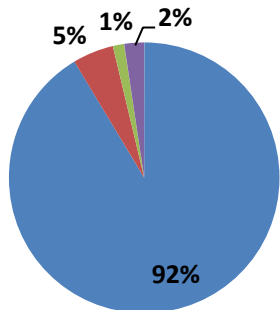

**Indian WWTP  
Upstream 2**

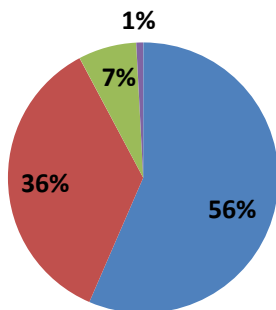

**Swedish WWTP  
Downstream**

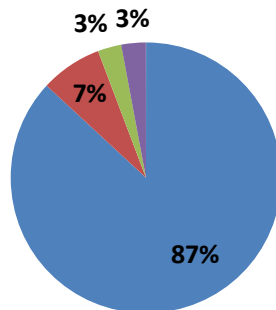

**Swedish WWTP  
Upstream**
