# Supplementary material for: Pyrosequencing of Antibiotic-Contaminated River Sediments Reveals High Levels of Resistance and Gene Transfer Elements
Source: PubMed Central journal article supplement (PMC3040208; doi:10.1371/journal.pone.0017038), 2011-02-16
Supplement: pone.0017038.s006.pdf [file pone.0017038.s006.pdf]

■ Proteobacteria ■ Bacteroidetes ■ Firmicutes ■ Actinobacteria ■ Chlamydiae ■ Fibrobacteres ■ Others

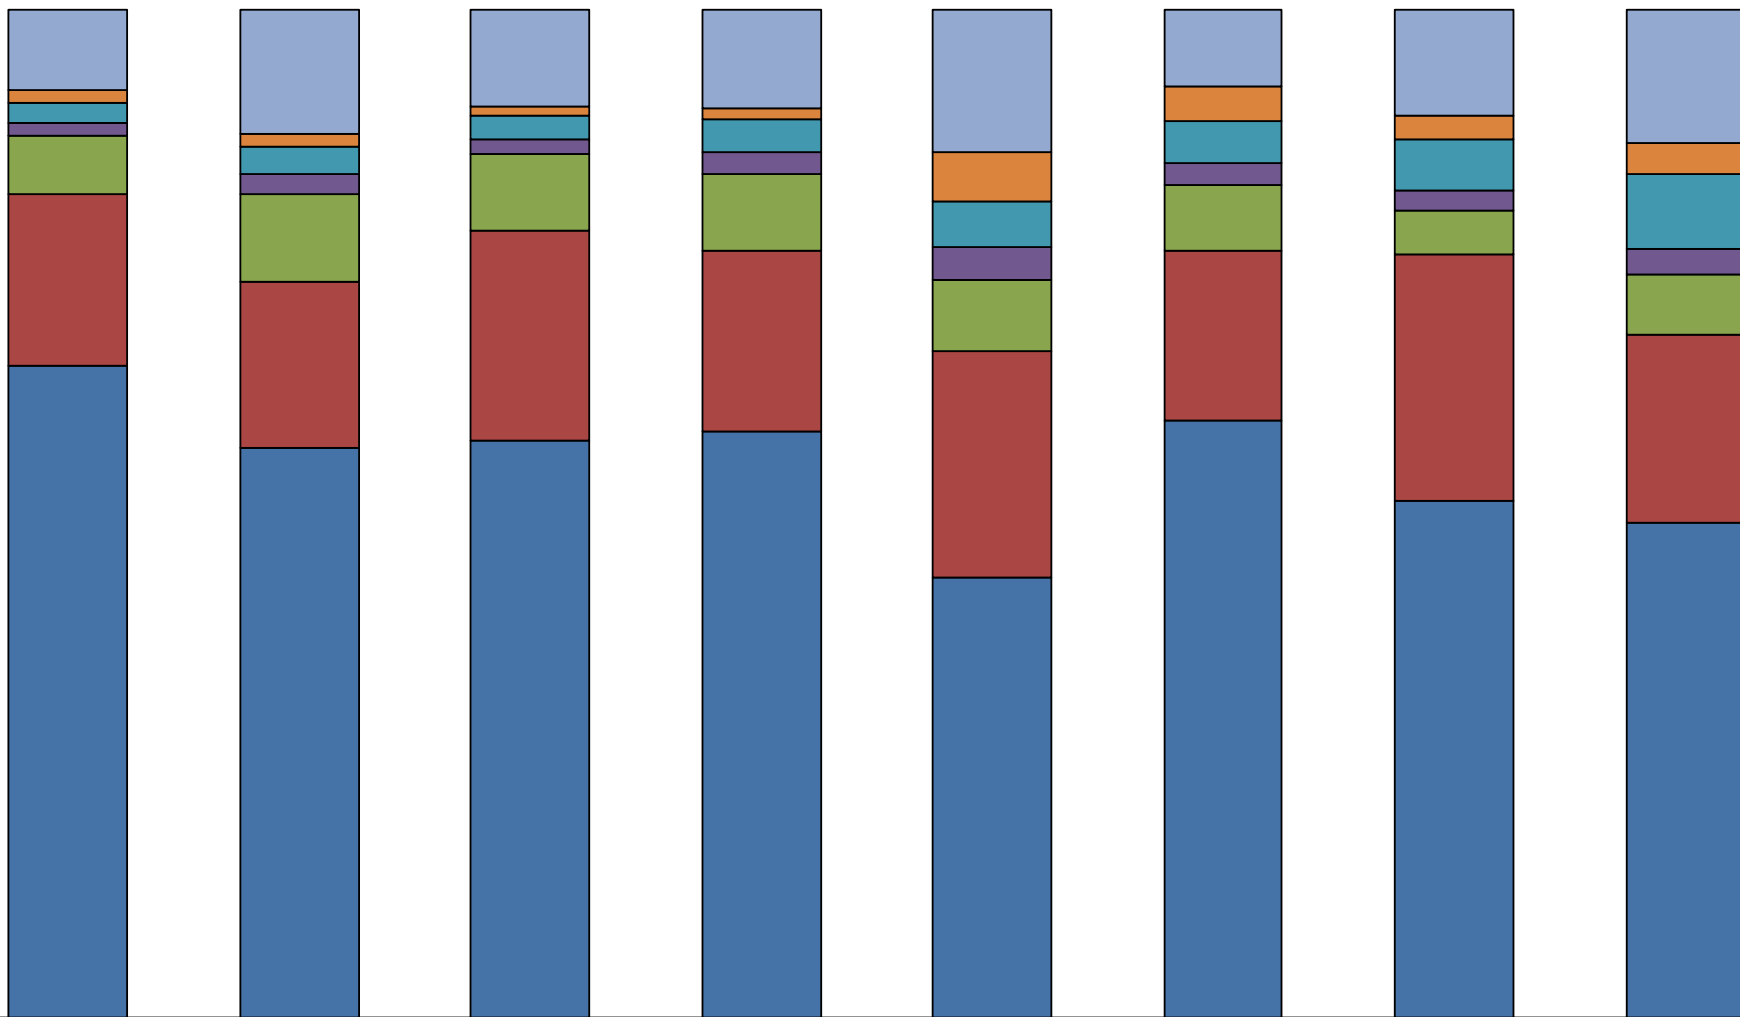

Indian WWTP  
Downstream 1

Indian WWTP  
Downstream 2

Indian WWTP  
Downstream 3

Indian WWTP  
Discharge site

Indian WWTP  
Upstream 1

Indian WWTP  
Upstream 2

Swedish WWTP  
Downstream

Swedish WWTP  
Upstream
