# Supplementary material for: Pyrosequencing of Antibiotic-Contaminated River Sediments Reveals High Levels of Resistance and Gene Transfer Elements
Source: PubMed Central journal article supplement (PMC3040208; doi:10.1371/journal.pone.0017038), 2011-02-16

| <b>Marker</b> | <b>pHIRE-D1</b><br>Indian WWTP<br>Downstream 2 | <b>pHIRE-D1</b><br>Indian WWTP<br>Downstream 3 | <b>pHIRE-U1</b><br>Indian WWTP<br>Upstream 2 |
|---------------|------------------------------------------------|------------------------------------------------|----------------------------------------------|
|---------------|------------------------------------------------|------------------------------------------------|----------------------------------------------|

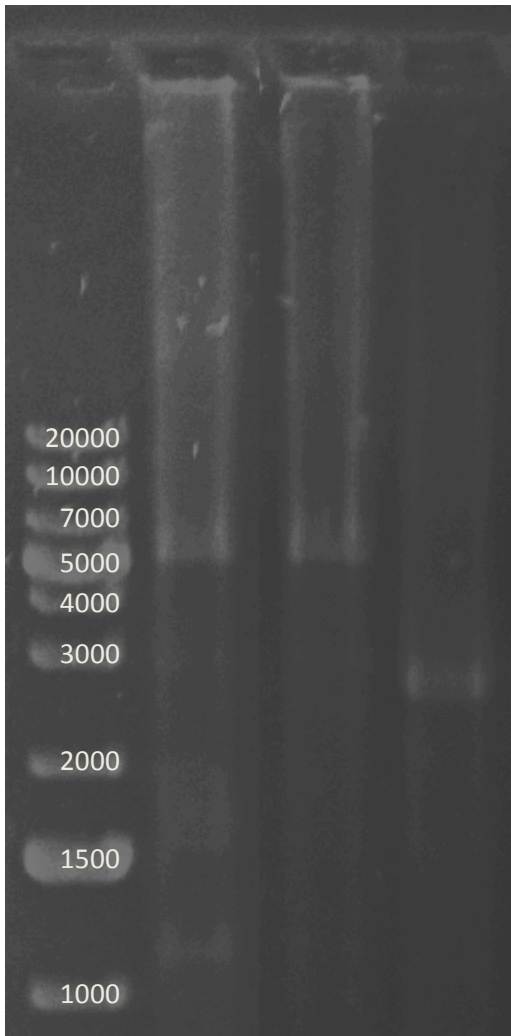

Supplement: pone.0017038.s008.pdf [file pone.0017038.s008.pdf]
