# Supplementary material for: Pyrosequencing of Antibiotic-Contaminated River Sediments Reveals High Levels of Resistance and Gene Transfer Elements
Source: PubMed Central journal article supplement (PMC3040208; doi:10.1371/journal.pone.0017038), 2011-02-16
Supplement: pone.0017038.s009.pdf [file pone.0017038.s009.pdf]

**Table S1**

| <b>Site</b>                       | <b>ID</b> | <b>Distance from WWTP</b> | <b>Number of replicated samples</b> | <b>GPS coordinates</b>         |
|-----------------------------------|-----------|---------------------------|-------------------------------------|--------------------------------|
| <b>Indian WWTP Downstream 1</b>   | R2        | 2.3 km downstream         | 5                                   | N 17° 33. 077<br>E 78° 13.983  |
| <b>Indian WWTP Downstream 2</b>   | R3        | 2.7 km downstream         | 5                                   | N 17° 33. 211<br>E 78° 13.846  |
| <b>Indian WWTP Downstream 3</b>   | R1        | 17.5 km downstream        | 5                                   | N 17° 37. 945<br>E 78° 09. 813 |
| <b>Indian WWTP Discharge site</b> | R4        | 50 m downstream           | 5                                   | N 17° 32. 394<br>E 78° 14. 552 |
| <b>Indian WWTP Upstream 1</b>     | R5        | 1.9 km upstream           | 5                                   | N 17° 37. 357<br>E 78° 15. 537 |
| <b>Indian WWTP Upstream 2</b>     | R6        | 2.2 km upstream           | 5                                   | N 17° 32. 440<br>E 78° 15. 707 |
| <b>Swedish WWTP Downstream</b>    | N         | 25 - 230 m downstream     | 6                                   | N 58° 23. 350<br>E 13° 52. 900 |
| <b>Swedish WWTP Upstream</b>      | U         | 5 - 100 m upstream        | 5                                   | N 58° 23. 500<br>E 13° 52. 700 |
