# Supplementary material for: Pyrosequencing of Antibiotic-Contaminated River Sediments Reveals High Levels of Resistance and Gene Transfer Elements
Source: PubMed Central journal article supplement (PMC3040208; doi:10.1371/journal.pone.0017038), 2011-02-16
Supplement: pone.0017038.s010.pdf [file pone.0017038.s010.pdf]

|                                           |     |      |      |     |     |     |     |     |     |
|-------------------------------------------|-----|------|------|-----|-----|-----|-----|-----|-----|
| Sulfadiazine *                            | 500 | N.D. | N.D. | N.D | N.D | N.D | N.D | N.D | N.D |
| Sulfadiazine *                            | 500 | N.D. | N.D. | N.D | N.D | N.D | N.D | N.D | N.D |
| Sulfadimidine *                           | 500 | N.D. | N.D. | N.D | N.D | N.D | N.D | N.D | N.D |
| Sulfadoxine *                             | 500 | N.D. | N.D. | N.D | N.D | N.D | N.D | N.D | N.D |
| Sulfafurazole *                           | 500 | N.D. | N.D. | N.D | N.D | N.D | N.D | N.D | N.D |
| Sulfaguanidine *                          | 500 | N.D. | N.D. | N.D | N.D | N.D | N.D | N.D | N.D |
| Sulfamethylthiazole *                     | 500 | N.D. | N.D. | N.D | N.D | N.D | N.D | N.D | N.D |
| Sulfametomidine *                         | 500 | N.D. | N.D. | N.D | N.D | N.D | N.D | N.D | N.D |
| Sulfametopyrazine *                       | 500 | N.D. | N.D. | N.D | N.D | N.D | N.D | N.D | N.D |
| Sulfametrole *                            | 500 | N.D. | N.D. | N.D | N.D | N.D | N.D | N.D | N.D |
| Sulfamonomethoxine *                      | 500 | N.D. | N.D. | N.D | N.D | N.D | N.D | N.D | N.D |
| Sulfaquinoxaline *                        | 500 | N.D. | N.D. | N.D | N.D | N.D | N.D | N.D | N.D |
| Sulfathiourea *                           | 500 | N.D. | N.D. | N.D | N.D | N.D | N.D | N.D | N.D |
| Sulfatroxazole *                          | 500 | N.D. | N.D. | N.D | N.D | N.D | N.D | N.D | N.D |
| Sulfisomidine *                           | 500 | N.D. | N.D. | N.D | N.D | N.D | N.D | N.D | N.D |
| Acetyl-Sulfadiazine *                     | 500 | N.D. | N.D. | N.D | N.D | N.D | N.D | N.D | N.D |
| Acetyl-Sulfadimethoxine *                 | 500 | N.D. | N.D. | N.D | N.D | N.D | N.D | N.D | N.D |
| Acetyl-Sulfamethazine *                   | 500 | N.D. | N.D. | N.D | N.D | N.D | N.D | N.D | N.D |
| Acetyl-Sulfamethoxazole *                 | 500 | N.D. | N.D. | N.D | N.D | N.D | N.D | N.D | N.D |
| Acetyl-Sulfathiazole *                    | 500 | N.D. | N.D. | N.D | N.D | N.D | N.D | N.D | N.D |
| Pterine-sulfathiazole *                   | 500 | N.D. | N.D. | N.D | N.D | N.D | N.D | N.D | N.D |
| 7,8-Dihydropterine-sulfathiazole *        | 500 | N.D. | N.D. | N.D | N.D | N.D | N.D | N.D | N.D |
| 4-Hydroxy-sulfathiazole *                 | 500 | N.D. | N.D. | N.D | N.D | N.D | N.D | N.D | N.D |
| 4-Amino-2-hydroxybenzoic acid *           | 500 | N.D. | N.D. | N.D | N.D | N.D | N.D | N.D | N.D |
| Para-Aminobenzoic acid *                  | 500 | N.D. | N.D. | N.D | N.D | N.D | N.D | N.D | N.D |
| 4-Acetylamino- benzenesulfonyl chloride * | 500 | N.D. | N.D. | N.D | N.D | N.D | N.D | N.D | N.D |
| 4-Acetylamino- benzenesulfonic acid *     | 500 | N.D. | N.D. | N.D | N.D | N.D | N.D | N.D | N.D |
