# Supplementary material for: Pyrosequencing of Antibiotic-Contaminated River Sediments Reveals High Levels of Resistance and Gene Transfer Elements
Source: PubMed Central journal article supplement (PMC3040208; doi:10.1371/journal.pone.0017038), 2011-02-16
Supplement: pone.0017038.s011.pdf [file pone.0017038.s011.pdf]

**Table S3**

| Substance                                           | Detection Limit | Indian WWTP Downstream 1 | Indian WWTP Downstream 2 | Indian WWTP Downstream 3 | Indian WWTP Discharge site | Indian WWTP Upstream 1 | Indian WWTP Upstream 2 | Swedish WWTP Downstream | Swedish WWTP Upstream |
|-----------------------------------------------------|-----------------|--------------------------|--------------------------|--------------------------|----------------------------|------------------------|------------------------|-------------------------|-----------------------|
| <i>Fluroquinolones</i>                              |                 |                          |                          |                          |                            |                        |                        |                         |                       |
| Ciprofloxacin                                       | 20              | 54248 (22427)            | 11551 (2990)             | 1700 (274)               | 18034 (3507)               | 449 (397)              | 1077 (233)             | N.D.                    | N.D.                  |
| Difloxacin                                          | 20              | N.D.                     | N.D.                     | N.D                      | N.D                        | 146 (351)              | N.D                    | N.D                     | N.D                   |
| Enoxacin                                            | 20              | N.D.                     | N.D.                     | N.D                      | N.D                        | N.D                    | N.D                    | N.D                     | N.D                   |
| Enrofloxacin                                        | 20              | 5981 (2753)              | 1625 (87)                | 374 (68)                 | 2054 (195)                 | 912 (458)              | 651 (644)              | N.D                     | N.D                   |
| Lomefloxacin                                        | 20              | N.D.                     | N.D                      | N.D                      | N.D                        | 373 (351)              | 134 (98)               | N.D                     | N.D                   |
| Ofloxacin                                           | 20              | 62 (21)                  | 80 (76)                  | 121 (121)                | 26 (5)                     | N.D                    | N.D                    | N.D                     | N.D                   |
| Pefloxacin                                          | 20              | 486 (786)                | 502 (129)                | 157 (66)                 | 611 (123)                  | 575 (127)              | 581 (437)              | N.D                     | N.D                   |
| Norfloxacin                                         | 20              | N.D.                     | N.D.                     | N.D                      | N.D                        | N.D                    | N.D                    | N.D                     | N.D                   |
| <i>Sulfonamides and sulfonamide-like substances</i> |                 |                          |                          |                          |                            |                        |                        |                         |                       |
| Sulfamethoxazol                                     | 1               | N.D.                     | N.D.                     | N.D                      | N.D                        | N.D                    | N.D                    | N.D                     | N.D                   |
| Sulfanilamide                                       | 1               | N.D.                     | N.D.                     | N.D                      | N.D                        | N.D                    | N.D                    | N.D                     | N.D                   |
| Sulfapyridine                                       | 1               | N.D.                     | N.D.                     | N.D                      | N.D                        | N.D                    | N.D                    | N.D                     | N.D                   |
| Sulfathiazol                                        | 1               | N.D.                     | N.D.                     | N.D                      | N.D                        | N.D                    | N.D                    | N.D                     | N.D                   |
| Sulfamerazine                                       | 1               | N.D.                     | N.D.                     | N.D                      | N.D                        | N.D                    | N.D                    | N.D                     | N.D                   |
| Sulfamoxol                                          | 1               | N.D.                     | N.D.                     | N.D                      | N.D                        | N.D                    | N.D                    | N.D                     | N.D                   |
| Sulfamethizole                                      | 1               | N.D.                     | N.D.                     | N.D                      | N.D                        | N.D                    | N.D                    | N.D                     | N.D                   |
| Sulfamethazine                                      | 1               | N.D.                     | N.D.                     | N.D                      | N.D                        | N.D                    | N.D                    | N.D                     | N.D                   |
| Sulfamethoxy pyridazine                             | 1               | N.D.                     | N.D.                     | N.D                      | N.D                        | N.D                    | N.D                    | N.D                     | N.D                   |
| Sulfadimethoxine                                    | 1               | N.D.                     | N.D.                     | N.D                      | N.D                        | N.D                    | N.D                    | N.D                     | N.D                   |
| Sulfaphenazole                                      | 1               | N.D.                     | N.D.                     | N.D                      | N.D                        | N.D                    | N.D                    | N.D                     | N.D                   |
| Sulfabenzamide *                                    | 20              | N.D.                     | N.D.                     | N.D                      | N.D                        | N.D                    | N.D                    | N.D                     | N.D                   |
| Sulfacarbamide *                                    | 20              | N.D.                     | N.D.                     | N.D                      | N.D                        | N.D                    | N.D                    | N.D                     | N.D                   |
| Sulfacetamide *                                     | 20              | N.D.                     | N.D.                     | N.D                      | N.D                        | N.D                    | N.D                    | N.D                     | N.D                   |
| Sulfachlorpyridazine *                              | 20              | N.D.                     | N.D.                     | N.D                      | N.D                        | N.D                    | N.D                    | N.D                     | N.D                   |
| Sulfachrysoidine *                                  | 20              | N.D.                     | N.D.                     | N.D                      | N.D                        | N.D                    | N.D                    | N.D                     | N.D                   |
| Sulfaclozine *                                      | 20              | N.D.                     | N.D.                     | N.D                      | N.D                        | N.D                    | N.D                    | N.D                     | N.D                   |
