# Supplementary material for: Pyrosequencing of Antibiotic-Contaminated River Sediments Reveals High Levels of Resistance and Gene Transfer Elements
Source: PubMed Central journal article supplement (PMC3040208; doi:10.1371/journal.pone.0017038), 2011-02-16
Supplement: pone.0017038.s013.pdf [file pone.0017038.s013.pdf]

Table S5

| Genus                    | Indian WWTP<br>Downstream 1 | Indian WWTP<br>Downstream 2 | Indian WWTP<br>Downstream 3 | Indian WWTP<br>Discharge site | Indian WWTP<br>Upstream 1 | Indian WWTP<br>Upstream 2 | Swedish WWTP<br>Downstream | Swedish WWTP<br>Upstream |
|--------------------------|-----------------------------|-----------------------------|-----------------------------|-------------------------------|---------------------------|---------------------------|----------------------------|--------------------------|
| <i>Abiotrophia</i>       | 0                           | 0                           | 0                           | 15                            | 0                         | 0                         | 0                          | 0                        |
| <i>Acaryochloris</i>     | 26                          | 18                          | 11                          | 22                            | 45                        | 10                        | 0                          | 32                       |
| <i>Acholeplasma</i>      | 22                          | 0                           | 0                           | 38                            | 0                         | 0                         | 0                          | 0                        |
| <i>Acidiphilium</i>      | 18                          | 13                          | 20                          | 30                            | 18                        | 25                        | 0                          | 17                       |
| <i>Acidithiobacillus</i> | 51                          | 22                          | 19                          | 84                            | 67                        | 88                        | 15                         | 37                       |
| <i>Acidobacterium</i>    | 24                          | 14                          | 0                           | 37                            | 71                        | 48                        | 10                         | 58                       |
| <i>Acidothermus</i>      | 0                           | 0                           | 0                           | 0                             | 0                         | 0                         | 0                          | 12                       |
| <i>Acidovorax</i>        | 110                         | 61                          | 67                          | 254                           | 190                       | 144                       | 95                         | 168                      |
| <i>Aciduliprofundum</i>  | 12                          | 12                          | 0                           | 0                             | 0                         | 0                         | 0                          | 33                       |
| <i>Acinetobacter</i>     | 699                         | 205                         | 248                         | 405                           | 189                       | 202                       | 61                         | 59                       |
| <i>Actinobacillus</i>    | 522                         | 239                         | 225                         | 144                           | 0                         | 0                         | 0                          | 0                        |
| <i>Actinosynnema</i>     | 0                           | 0                           | 0                           | 0                             | 15                        | 0                         | 0                          | 0                        |
| <i>Aeromonas</i>         | 78                          | 48                          | 24                          | 219                           | 115                       | 522                       | 17                         | 25                       |
| <i>Agrobacterium</i>     | 18                          | 15                          | 19                          | 46                            | 44                        | 37                        | 21                         | 60                       |
| <i>Akkermansia</i>       | 14                          | 0                           | 15                          | 21                            | 11                        | 30                        | 10                         | 99                       |
| <i>Alcanivorax</i>       | 14                          | 11                          | 0                           | 24                            | 0                         | 20                        | 0                          | 36                       |
| <i>Algoriphagus</i>      | 157                         | 89                          | 142                         | 167                           | 214                       | 56                        | 39                         | 185                      |
| <i>Alicyclobacillus</i>  | 18                          | 24                          | 10                          | 22                            | 12                        | 0                         | 0                          | 21                       |
| <i>Aliivibrio</i>        | 228                         | 139                         | 98                          | 123                           | 18                        | 19                        | 0                          | 0                        |
| <i>Alistipes</i>         | 106                         | 46                          | 69                          | 142                           | 70                        | 109                       | 16                         | 32                       |
| <i>Alkalilimnicola</i>   | 0                           | 0                           | 0                           | 27                            | 19                        | 0                         | 0                          | 22                       |
| <i>Alkaliphilus</i>      | 63                          | 43                          | 33                          | 106                           | 65                        | 39                        | 15                         | 37                       |
| <i>Allochromatium</i>    | 55                          | 31                          | 26                          | 103                           | 100                       | 55                        | 17                         | 48                       |
| <i>Alteromonas</i>       | 0                           | 0                           | 0                           | 14                            | 15                        | 0                         | 0                          | 0                        |
| <i>Anabaena</i>          | 25                          | 13                          | 14                          | 19                            | 34                        | 14                        | 0                          | 34                       |
| <i>Anaerocellum</i>      | 12                          | 14                          | 12                          | 21                            | 13                        | 0                         | 0                          | 19                       |
| <i>Anaerofustis</i>      | 0                           | 0                           | 0                           | 0                             | 0                         | 0                         | 0                          | 0                        |
| <i>Anaeromyxobacter</i>  | 61                          | 32                          | 25                          | 64                            | 176                       | 51                        | 42                         | 131                      |
| <i>Anaerotruncus</i>     | 18                          | 0                           | 0                           | 14                            | 14                        | 0                         | 0                          | 0                        |
| <i>Anoxybacillus</i>     | 0                           | 0                           | 0                           | 0                             | 14                        | 0                         | 0                          | 0                        |
| <i>Aquifex</i>           | 0                           | 0                           | 0                           | 0                             | 0                         | 0                         | 0                          | 14                       |
| <i>Arcanobacterium</i>   | 0                           | 0                           | 0                           | 35                            | 0                         | 0                         | 0                          | 0                        |
| <i>Archaeoglobus</i>     | 0                           | 0                           | 0                           | 13                            | 0                         | 10                        | 0                          | 27                       |
| <i>Arcobacter</i>        | 294                         | 32                          | 115                         | 427                           | 343                       | 68                        | 0                          | 45                       |
| <i>Aromatoleum</i>       | 36                          | 26                          | 18                          | 66                            | 42                        | 46                        | 24                         | 89                       |
| <i>Arthrobacter</i>      | 0                           | 14                          | 0                           | 21                            | 31                        | 10                        | 10                         | 21                       |
| <i>Arthrospira</i>       | 28                          | 21                          | 0                           | 21                            | 26                        | 10                        | 0                          | 15                       |
| <i>Asticcacaulis</i>     | 15                          | 0                           | 0                           | 17                            | 0                         | 14                        | 0                          | 20                       |
| <i>Aurantimonas</i>      | 0                           | 0                           | 0                           | 11                            | 0                         | 0                         | 0                          | 14                       |
| <i>Azoarcus</i>          | 38                          | 23                          | 15                          | 67                            | 44                        | 47                        | 20                         | 75                       |
| <i>Azorhizobium</i>      | 0                           | 0                           | 0                           | 12                            | 12                        | 12                        | 0                          | 14                       |
| <i>Azotobacter</i>       | 19                          | 0                           | 0                           | 24                            | 17                        | 13                        | 0                          | 26                       |
| <i>Bacillus</i>          | 208                         | 107                         | 77                          | 291                           | 205                       | 240                       | 38                         | 120                      |
| <i>Bacteroides</i>       | 1022                        | 490                         | 666                         | 1236                          | 770                       | 1024                      | 169                        | 391                      |
| <i>Bartonella</i>        | 1232                        | 436                         | 403                         | 227                           | 99                        | 255                       | 0                          | 0                        |
| <i>Bdellovibrio</i>      | 38                          | 30                          | 16                          | 31                            | 41                        | 0                         | 16                         | 44                       |
| <i>Beggiatoa</i>         | 34                          | 27                          | 20                          | 33                            | 42                        | 26                        | 16                         | 51                       |
| <i>Beijerinckia</i>      | 0                           | 0                           | 0                           | 12                            | 17                        | 11                        | 0                          | 10                       |

|                                |      |     |     |      |     |     |     |     |
|--------------------------------|------|-----|-----|------|-----|-----|-----|-----|
| Bermanella                     | 0    | 0   | 0   | 0    | 0   | 0   | 0   | 13  |
| Beutenbergia                   | 0    | 0   | 0   | 14   | 0   | 0   | 0   | 14  |
| Bifidobacterium                | 26   | 17  | 13  | 34   | 10  | 22  | 0   | 12  |
| Blastopirellula                | 52   | 50  | 20  | 101  | 149 | 41  | 50  | 171 |
| Blautia                        | 0    | 0   | 0   | 17   | 0   | 0   | 0   | 0   |
| Bordetella                     | 94   | 49  | 25  | 172  | 53  | 39  | 21  | 76  |
| Brachyspira                    | 14   | 0   | 14  | 21   | 10  | 0   | 0   | 11  |
| Bradyrhizobium                 | 43   | 19  | 15  | 45   | 77  | 53  | 35  | 178 |
| Brevibacillus                  | 15   | 14  | 12  | 31   | 25  | 18  | 0   | 25  |
| Brevundimonas                  | 10   | 0   | 0   | 11   | 0   | 19  | 0   | 13  |
| Brucella                       | 14   | 0   | 0   | 18   | 0   | 0   | 0   | 26  |
| Burkholderia                   | 1263 | 461 | 637 | 1585 | 360 | 255 | 133 | 339 |
| Caldicellulosiruptor           | 19   | 12  | 12  | 19   | 0   | 0   | 0   | 0   |
| Caminibacter                   | 0    | 0   | 0   | 11   | 0   | 0   | 0   | 0   |
| Campylobacter                  | 183  | 33  | 49  | 170  | 74  | 55  | 0   | 28  |
| Candidatus Amoebophilus        | 12   | 0   | 0   | 14   | 15  | 0   | 0   | 15  |
| Candidatus Azobacteroides      | 20   | 12  | 20  | 16   | 16  | 12  | 0   | 0   |
| Candidatus Chloracidobacterium | 0    | 0   | 0   | 0    | 19  | 0   | 0   | 0   |
| Candidatus Cloacamonas         | 69   | 49  | 54  | 70   | 26  | 22  | 0   | 26  |
| Candidatus Desulforudis        | 13   | 11  | 0   | 26   | 21  | 12  | 0   | 34  |
| Candidatus Hamiltonella        | 0    | 0   | 0   | 26   | 0   | 10  | 0   | 0   |
| Candidatus Korarchaeum         | 0    | 0   | 0   | 10   | 0   | 0   | 0   | 17  |
| Candidatus Koribacter          | 82   | 34  | 31  | 82   | 255 | 316 | 49  | 153 |
| Candidatus Kuenenia            | 45   | 39  | 27  | 70   | 74  | 27  | 35  | 114 |
| Candidatus Methanoregula       | 17   | 24  | 0   | 23   | 16  | 31  | 0   | 38  |
| Candidatus Pelagibacter        | 0    | 0   | 0   | 0    | 0   | 0   | 0   | 10  |
| Candidatus Phytoplasma         | 0    | 0   | 0   | 23   | 0   | 0   | 0   | 0   |
| Candidatus Protochlamydia      | 0    | 20  | 0   | 41   | 0   | 14  | 0   | 11  |
| Candidatus Solibacter          | 255  | 105 | 75  | 217  | 706 | 187 | 100 | 475 |
| Capnocytophaga                 | 41   | 27  | 36  | 61   | 33  | 27  | 14  | 33  |
| Carboxydibrachium              | 18   | 0   | 0   | 10   | 16  | 0   | 0   | 0   |
| Carboxydotherrmus              | 30   | 16  | 14  | 40   | 30  | 19  | 0   | 31  |
| Catenulispora                  | 0    | 0   | 0   | 0    | 14  | 0   | 0   | 12  |
| Caulobacter                    | 30   | 18  | 0   | 30   | 24  | 62  | 19  | 56  |
| Cellulomonas                   | 0    | 0   | 0   | 0    | 11  | 0   | 0   | 0   |
| Cellvibrio                     | 24   | 0   | 14  | 21   | 21  | 31  | 11  | 34  |
| Cenarchaeum                    | 0    | 0   | 0   | 0    | 19  | 0   | 0   | 0   |
| Chelativorans                  | 0    | 0   | 0   | 20   | 0   | 0   | 0   | 0   |
| Chitinophaga                   | 609  | 186 | 192 | 300  | 847 | 94  | 184 | 593 |
| Chlamydia                      | 14   | 19  | 0   | 87   | 0   | 0   | 0   | 0   |
| Chlamydophila                  | 22   | 30  | 13  | 57   | 10  | 20  | 58  | 17  |
| Chlorobaculum                  | 26   | 11  | 11  | 22   | 22  | 15  | 0   | 26  |
| Chlorobium                     | 104  | 51  | 55  | 131  | 85  | 76  | 29  | 115 |
| Chloroflexus                   | 126  | 145 | 73  | 183  | 179 | 34  | 41  | 99  |
| Chloroherpeton                 | 51   | 28  | 38  | 78   | 54  | 26  | 28  | 82  |
| Chromobacterium                | 17   | 0   | 0   | 17   | 0   | 0   | 10  | 31  |
| Chryseobacterium               | 97   | 34  | 43  | 159  | 104 | 72  | 38  | 67  |
| Chthoniobacter                 | 95   | 49  | 50  | 106  | 200 | 95  | 66  | 342 |
| Citrobacter                    | 933  | 315 | 411 | 362  | 52  | 62  | 0   | 0   |
| Clostridium                    | 378  | 280 | 299 | 524  | 302 | 209 | 64  | 236 |
| Collinsella                    | 0    | 0   | 0   | 14   | 13  | 0   | 0   | 0   |
| Colwellia                      | 10   | 0   | 0   | 16   | 14  | 0   | 0   | 17  |

|                    |     |     |     |     |     |     |     |     |
|--------------------|-----|-----|-----|-----|-----|-----|-----|-----|
| Comamonas          | 369 | 164 | 168 | 271 | 207 | 160 | 63  | 67  |
| Congregibacter     | 15  | 0   | 0   | 14  | 11  | 0   | 0   | 22  |
| Coprococcus        | 13  | 0   | 0   | 11  | 0   | 0   | 0   | 0   |
| Coprothermobacter  | 0   | 0   | 0   | 10  | 0   | 0   | 0   | 0   |
| Corynebacterium    | 11  | 13  | 0   | 18  | 0   | 16  | 0   | 13  |
| Coxiella           | 0   | 0   | 0   | 11  | 0   | 10  | 0   | 18  |
| Croceibacter       | 41  | 19  | 34  | 41  | 24  | 0   | 0   | 22  |
| Crocospaera        | 12  | 0   | 0   | 0   | 16  | 0   | 0   | 11  |
| Cupriavidus        | 280 | 86  | 101 | 892 | 259 | 263 | 68  | 187 |
| Cyanothece         | 96  | 49  | 49  | 135 | 174 | 73  | 30  | 102 |
| Cytophaga          | 160 | 51  | 60  | 114 | 161 | 34  | 62  | 193 |
| Dechloromonas      | 149 | 62  | 47  | 158 | 113 | 235 | 125 | 232 |
| Dehalococcoides    | 49  | 36  | 33  | 58  | 36  | 17  | 17  | 230 |
| Deinococcus        | 0   | 22  | 10  | 27  | 39  | 17  | 10  | 31  |
| Delftia            | 32  | 12  | 12  | 54  | 20  | 11  | 16  | 41  |
| Denitrovibrio      | 26  | 16  | 13  | 27  | 20  | 0   | 0   | 10  |
| Desulfatibacillum  | 69  | 60  | 48  | 86  | 73  | 70  | 26  | 119 |
| Desulfitobacterium | 36  | 24  | 29  | 44  | 44  | 32  | 0   | 48  |
| Desulfobacterium   | 63  | 50  | 49  | 91  | 47  | 48  | 21  | 72  |
| Desulfococcus      | 66  | 46  | 49  | 99  | 44  | 59  | 20  | 100 |
| Desulfohalobium    | 0   | 0   | 13  | 16  | 18  | 18  | 0   | 19  |
| Desulfonatrosopira | 23  | 17  | 23  | 30  | 21  | 24  | 11  | 43  |
| Desulfotalea       | 40  | 17  | 26  | 54  | 22  | 53  | 29  | 42  |
| Desulfotomaculum   | 41  | 36  | 32  | 77  | 47  | 24  | 19  | 62  |
| Desulfovibrio      | 137 | 84  | 78  | 206 | 130 | 168 | 28  | 127 |
| Desulfuromonas     | 102 | 36  | 51  | 113 | 55  | 43  | 15  | 37  |
| Dethiobacter       | 29  | 23  | 13  | 40  | 27  | 18  | 0   | 39  |
| Dethiosulfovibrio  | 40  | 17  | 16  | 50  | 18  | 68  | 0   | 0   |
| Diaphorobacter     | 22  | 21  | 0   | 55  | 13  | 27  | 16  | 22  |
| Dickeya            | 24  | 0   | 0   | 22  | 11  | 12  | 0   | 12  |
| Dictyoglomus       | 33  | 26  | 21  | 43  | 30  | 17  | 0   | 33  |
| Dinoroseobacter    | 0   | 0   | 0   | 0   | 0   | 0   | 0   | 21  |
| Dokdonia           | 33  | 14  | 20  | 45  | 21  | 15  | 12  | 25  |
| Dyadobacter        | 240 | 81  | 129 | 166 | 294 | 71  | 89  | 247 |
| Elusimicrobium     | 10  | 10  | 13  | 0   | 12  | 10  | 0   | 17  |
| Endoriftia         | 0   | 0   | 0   | 11  | 11  | 0   | 0   | 0   |
| Enterobacter       | 27  | 12  | 15  | 32  | 16  | 52  | 0   | 0   |
| Enterococcus       | 0   | 0   | 0   | 10  | 0   | 0   | 0   | 0   |
| Erwinia            | 0   | 0   | 0   | 13  | 14  | 15  | 0   | 13  |
| Erythrobacter      | 42  | 29  | 16  | 55  | 42  | 31  | 14  | 61  |
| Escherichia        | 819 | 391 | 327 | 565 | 258 | 280 | 28  | 315 |
| Eubacterium        | 26  | 18  | 25  | 33  | 19  | 20  | 0   | 11  |
| Exiguobacterium    | 0   | 0   | 0   | 0   | 10  | 0   | 0   | 0   |
| Faecalibacterium   | 0   | 0   | 0   | 10  | 0   | 0   | 0   | 0   |
| Fervidobacterium   | 0   | 0   | 0   | 11  | 0   | 0   | 0   | 0   |
| Fibrobacter        | 10  | 0   | 14  | 23  | 18  | 20  | 0   | 19  |
| Flavobacterium     | 202 | 86  | 105 | 281 | 225 | 70  | 359 | 388 |
| Francisella        | 14  | 0   | 0   | 20  | 0   | 0   | 0   | 12  |
| Frankia            | 15  | 0   | 0   | 19  | 41  | 10  | 0   | 50  |
| Fusobacterium      | 32  | 16  | 16  | 39  | 20  | 17  | 0   | 18  |
| Gallibacterium     | 48  | 43  | 15  | 38  | 0   | 0   | 0   | 0   |
| Gallionella        | 54  | 26  | 23  | 61  | 28  | 26  | 42  | 111 |

|                   |     |     |     |     |     |     |     |     |
|-------------------|-----|-----|-----|-----|-----|-----|-----|-----|
| Gemmata           | 72  | 34  | 22  | 75  | 163 | 57  | 29  | 160 |
| Gemmatimonas      | 52  | 18  | 11  | 37  | 125 | 0   | 21  | 108 |
| Geobacillus       | 62  | 60  | 40  | 88  | 63  | 31  | 12  | 69  |
| Geobacter         | 988 | 359 | 284 | 892 | 526 | 652 | 210 | 694 |
| Geodermatophilus  | 11  | 0   | 0   | 0   | 19  | 0   | 0   | 13  |
| Gloeobacter       | 23  | 0   | 0   | 23  | 49  | 13  | 0   | 41  |
| Gluconacetobacter | 0   | 0   | 0   | 13  | 0   | 11  | 0   | 14  |
| Gluconobacter     | 0   | 0   | 0   | 0   | 0   | 11  | 0   | 0   |
| Gramella          | 70  | 55  | 94  | 119 | 54  | 19  | 21  | 56  |
| Haemophilus       | 118 | 47  | 60  | 31  | 15  | 12  | 0   | 0   |
| Hafnia            | 0   | 0   | 0   | 0   | 0   | 0   | 0   | 0   |
| Hahella           | 14  | 10  | 0   | 26  | 18  | 14  | 0   | 38  |
| Haliangium        | 28  | 13  | 17  | 39  | 68  | 14  | 14  | 70  |
| Haloarcula        | 0   | 0   | 0   | 0   | 0   | 0   | 0   | 0   |
| Halomonas         | 0   | 0   | 0   | 11  | 0   | 0   | 0   | 0   |
| Halorhodospira    | 0   | 0   | 0   | 10  | 0   | 0   | 0   | 0   |
| Halothermothrix   | 17  | 26  | 21  | 26  | 30  | 13  | 10  | 32  |
| Halothiobacillus  | 16  | 0   | 0   | 20  | 15  | 12  | 0   | 14  |
| Helicobacter      | 65  | 14  | 16  | 88  | 17  | 17  | 0   | 19  |
| Heliobacterium    | 14  | 12  | 18  | 35  | 26  | 10  | 0   | 33  |
| Herminiimonas     | 20  | 0   | 0   | 17  | 10  | 0   | 23  | 36  |
| Herpetosiphon     | 94  | 93  | 64  | 138 | 171 | 34  | 38  | 89  |
| Hirschia          | 0   | 0   | 0   | 0   | 0   | 0   | 0   | 23  |
| Histophilus       | 0   | 0   | 0   | 14  | 11  | 0   | 0   | 0   |
| Hoefflea          | 0   | 0   | 0   | 0   | 0   | 12  | 0   | 12  |
| Holdemania        | 21  | 11  | 20  | 37  | 11  | 10  | 0   | 0   |
| Hydrogenivirga    | 21  | 0   | 12  | 28  | 24  | 0   | 0   | 19  |
| Hyphomicrobium    | 0   | 10  | 0   | 11  | 21  | 10  | 15  | 40  |
| Hyphomonas        | 0   | 0   | 0   | 15  | 0   | 0   | 0   | 29  |
| Idiomarina        | 0   | 13  | 0   | 30  | 12  | 0   | 0   | 10  |
| Janibacter        | 0   | 0   | 0   | 12  | 0   | 0   | 0   | 0   |
| Jannaschia        | 0   | 0   | 0   | 0   | 0   | 0   | 0   | 10  |
| Janthinobacterium | 20  | 0   | 0   | 28  | 18  | 18  | 31  | 46  |
| Klebsiella        | 27  | 0   | 11  | 29  | 38  | 34  | 0   | 0   |
| Kordia            | 86  | 35  | 41  | 94  | 46  | 28  | 18  | 70  |
| Kosmotoga         | 16  | 30  | 17  | 35  | 16  | 0   | 0   | 19  |
| Kribbella         | 0   | 0   | 0   | 17  | 13  | 0   | 0   | 0   |
| Labrenzia         | 13  | 0   | 0   | 18  | 29  | 17  | 14  | 39  |
| Lactobacillus     | 26  | 17  | 17  | 44  | 29  | 21  | 0   | 21  |
| Lactococcus       | 14  | 0   | 0   | 17  | 0   | 0   | 0   | 0   |
| Laribacter        | 18  | 0   | 10  | 19  | 22  | 20  | 12  | 0   |
| Lawsonia          | 0   | 0   | 0   | 0   | 0   | 0   | 0   | 10  |
| Leeuwenhoekella   | 55  | 48  | 32  | 86  | 57  | 23  | 16  | 42  |
| Legionella        | 27  | 16  | 12  | 32  | 25  | 31  | 0   | 45  |
| Lentisphaera      | 31  | 17  | 17  | 37  | 24  | 18  | 0   | 40  |
| Leptospira        | 38  | 20  | 32  | 43  | 38  | 25  | 16  | 44  |
| Leptospirillum    | 25  | 24  | 23  | 47  | 52  | 24  | 31  | 67  |
| Leptothrix        | 27  | 10  | 14  | 34  | 36  | 15  | 32  | 191 |
| Limnobacter       | 0   | 0   | 0   | 19  | 13  | 0   | 13  | 19  |
| Listeria          | 18  | 0   | 0   | 0   | 11  | 0   | 0   | 0   |
| Loktanella        | 0   | 0   | 0   | 0   | 0   | 0   | 0   | 12  |
| Lutiella          | 19  | 12  | 0   | 23  | 25  | 16  | 17  | 42  |

|                     |     |     |     |     |     |     |     |     |
|---------------------|-----|-----|-----|-----|-----|-----|-----|-----|
| Lyngbya             | 39  | 18  | 11  | 32  | 48  | 13  | 12  | 23  |
| Magnetococcus       | 29  | 17  | 0   | 22  | 15  | 20  | 0   | 21  |
| Magnetospirillum    | 66  | 25  | 22  | 99  | 54  | 62  | 21  | 73  |
| Mannheimia          | 16  | 0   | 0   | 0   | 0   | 0   | 0   | 0   |
| Maricaulis          | 0   | 0   | 0   | 0   | 0   | 0   | 0   | 11  |
| Marinobacter        | 35  | 30  | 26  | 63  | 49  | 26  | 24  | 43  |
| Marinomonas         | 16  | 0   | 0   | 20  | 19  | 14  | 15  | 25  |
| Mariprofundus       | 13  | 14  | 0   | 29  | 18  | 0   | 0   | 27  |
| Meiothermus         | 32  | 24  | 19  | 48  | 60  | 14  | 15  | 38  |
| Mesorhizobium       | 42  | 39  | 0   | 68  | 56  | 38  | 25  | 89  |
| Methanocaldococcus  | 0   | 0   | 0   | 13  | 0   | 0   | 0   | 17  |
| Methanococcoides    | 41  | 21  | 13  | 31  | 0   | 0   | 0   | 25  |
| Methanococcus       | 17  | 12  | 0   | 16  | 0   | 0   | 0   | 27  |
| Methanoculleus      | 20  | 18  | 0   | 27  | 0   | 22  | 0   | 21  |
| Methanohalophilus   | 0   | 0   | 0   | 0   | 0   | 0   | 0   | 0   |
| Methanopyrus        | 0   | 0   | 0   | 0   | 0   | 0   | 0   | 15  |
| Methanosaeta        | 45  | 76  | 30  | 84  | 17  | 100 | 0   | 31  |
| Methanosarcina      | 75  | 82  | 40  | 95  | 52  | 52  | 24  | 91  |
| Methanosphaerula    | 18  | 15  | 10  | 23  | 18  | 28  | 0   | 30  |
| Methanospirillum    | 44  | 42  | 13  | 46  | 17  | 80  | 0   | 20  |
| Methanothermobacter | 16  | 14  | 0   | 33  | 0   | 0   | 0   | 20  |
| Methylacidiphilum   | 0   | 0   | 0   | 0   | 0   | 0   | 0   | 19  |
| Methylbium          | 20  | 0   | 12  | 30  | 24  | 13  | 23  | 191 |
| Methylobacillus     | 79  | 25  | 24  | 83  | 10  | 13  | 14  | 27  |
| Methylobacterium    | 51  | 30  | 26  | 74  | 126 | 78  | 50  | 85  |
| Methylocella        | 10  | 0   | 0   | 0   | 0   | 10  | 0   | 12  |
| Methylococcus       | 22  | 14  | 13  | 45  | 28  | 52  | 27  | 115 |
| Methylophaga        | 444 | 123 | 121 | 380 | 90  | 128 | 30  | 39  |
| Methylophilus       | 0   | 0   | 0   | 10  | 0   | 0   | 0   | 0   |
| Methylotenera       | 655 | 133 | 212 | 415 | 26  | 53  | 81  | 107 |
| Methylovorus        | 158 | 45  | 38  | 130 | 21  | 18  | 31  | 52  |
| Micrococcus         | 51  | 26  | 22  | 114 | 71  | 62  | 0   | 0   |
| Microcoleus         | 40  | 24  | 18  | 40  | 62  | 12  | 12  | 47  |
| Microcystis         | 34  | 22  | 15  | 41  | 35  | 16  | 16  | 46  |
| Micromonospora      | 14  | 0   | 0   | 11  | 19  | 0   | 0   | 0   |
| Microscilla         | 219 | 83  | 114 | 208 | 214 | 66  | 77  | 246 |
| Mitsuokella         | 0   | 0   | 0   | 10  | 0   | 0   | 0   | 0   |
| Moorella            | 28  | 23  | 20  | 48  | 36  | 10  | 0   | 56  |
| Moraxella           | 29  | 0   | 16  | 16  | 10  | 0   | 0   | 0   |
| Mycobacterium       | 34  | 30  | 16  | 53  | 70  | 45  | 21  | 71  |
| Myxococcus          | 46  | 20  | 18  | 48  | 83  | 24  | 17  | 67  |
| Natranaerobius      | 19  | 12  | 19  | 24  | 0   | 0   | 0   | 11  |
| Natrialba           | 0   | 0   | 0   | 11  | 0   | 0   | 0   | 0   |
| Nautilia            | 58  | 0   | 18  | 52  | 18  | 11  | 0   | 16  |
| Neisseria           | 400 | 132 | 165 | 247 | 120 | 198 | 26  | 42  |
| Neptuniibacter      | 0   | 0   | 0   | 16  | 0   | 13  | 0   | 13  |
| Nitratiruptor       | 65  | 0   | 12  | 50  | 16  | 12  | 0   | 30  |
| Nitrobacter         | 21  | 14  | 0   | 29  | 38  | 28  | 15  | 44  |
| Nitrococcus         | 13  | 0   | 0   | 19  | 20  | 17  | 13  | 41  |
| Nitrosococcus       | 23  | 24  | 0   | 37  | 38  | 14  | 23  | 45  |
| Nitrosomonas        | 295 | 177 | 156 | 451 | 182 | 190 | 124 | 208 |
| Nitrosopumilus      | 0   | 11  | 0   | 29  | 45  | 0   | 0   | 23  |

|                   |     |     |     |     |     |     |     |     |
|-------------------|-----|-----|-----|-----|-----|-----|-----|-----|
| Nitrospira        | 30  | 33  | 0   | 33  | 58  | 25  | 29  | 84  |
| Nitrospira        | 0   | 0   | 0   | 0   | 12  | 0   | 14  | 41  |
| Nocardioides      | 11  | 0   | 0   | 17  | 25  | 0   | 0   | 15  |
| Nodularia         | 16  | 0   | 0   | 22  | 14  | 0   | 0   | 10  |
| Nostoc            | 53  | 19  | 23  | 65  | 101 | 23  | 27  | 53  |
| Novosphingobium   | 36  | 17  | 14  | 36  | 30  | 39  | 17  | 69  |
| Oceanibulbus      | 0   | 0   | 0   | 0   | 0   | 0   | 0   | 11  |
| Oceanicola        | 12  | 0   | 0   | 16  | 10  | 14  | 0   | 36  |
| Oceanobacillus    | 0   | 0   | 0   | 10  | 0   | 0   | 0   | 0   |
| Ochrobactrum      | 23  | 12  | 0   | 45  | 15  | 15  | 0   | 27  |
| Octadecabacter    | 0   | 0   | 0   | 19  | 13  | 13  | 0   | 30  |
| Oligotropha       | 0   | 0   | 0   | 16  | 14  | 11  | 0   | 16  |
| Opitutus          | 76  | 41  | 38  | 90  | 146 | 58  | 39  | 169 |
| Oxalobacter       | 19  | 0   | 0   | 16  | 0   | 11  | 0   | 0   |
| Paenibacillus     | 52  | 32  | 33  | 86  | 55  | 27  | 0   | 60  |
| Parabacteroides   | 264 | 115 | 156 | 319 | 171 | 276 | 49  | 109 |
| Paracoccus        | 75  | 29  | 30  | 95  | 55  | 74  | 19  | 31  |
| Parvibaculum      | 17  | 16  | 0   | 40  | 29  | 29  | 0   | 50  |
| Pasteurella       | 302 | 115 | 125 | 99  | 15  | 36  | 0   | 0   |
| Pectobacterium    | 81  | 28  | 40  | 72  | 42  | 49  | 0   | 21  |
| Pedobacter        | 293 | 133 | 168 | 278 | 340 | 118 | 129 | 305 |
| Pelobacter        | 301 | 116 | 166 | 244 | 101 | 128 | 41  | 179 |
| Pelodictyon       | 33  | 18  | 17  | 30  | 12  | 27  | 10  | 30  |
| Pelotomaculum     | 18  | 23  | 0   | 30  | 36  | 18  | 0   | 52  |
| Persephonella     | 19  | 0   | 0   | 24  | 11  | 0   | 0   | 25  |
| Petrotoga         | 12  | 12  | 11  | 23  | 10  | 0   | 0   | 13  |
| Phenylobacterium  | 20  | 15  | 0   | 18  | 29  | 130 | 0   | 33  |
| Photobacterium    | 319 | 111 | 131 | 52  | 17  | 0   | 0   | 11  |
| Photorhabdus      | 114 | 27  | 42  | 34  | 19  | 17  | 0   | 10  |
| Planctomyces      | 101 | 84  | 61  | 166 | 151 | 82  | 83  | 292 |
| Planococcus       | 37  | 0   | 0   | 30  | 0   | 10  | 0   | 0   |
| Plesiocystis      | 20  | 15  | 0   | 25  | 31  | 14  | 0   | 50  |
| Plesiomonas       | 0   | 0   | 0   | 0   | 0   | 13  | 0   | 0   |
| Polaribacter      | 79  | 40  | 49  | 57  | 54  | 18  | 28  | 61  |
| Polaromonas       | 97  | 40  | 35  | 170 | 147 | 93  | 130 | 247 |
| Polynucleobacter  | 15  | 0   | 0   | 22  | 16  | 10  | 0   | 12  |
| Porphyromonas     | 75  | 53  | 48  | 102 | 63  | 56  | 15  | 26  |
| Prevotella        | 47  | 49  | 36  | 58  | 36  | 71  | 11  | 11  |
| Prochlorococcus   | 0   | 0   | 0   | 0   | 0   | 0   | 0   | 11  |
| Propionibacterium | 12  | 0   | 0   | 19  | 0   | 0   | 0   | 0   |
| Prosthecochloris  | 18  | 0   | 0   | 21  | 19  | 0   | 0   | 17  |
| Proteus           | 82  | 21  | 39  | 24  | 18  | 11  | 0   | 0   |
| Providencia       | 395 | 121 | 210 | 125 | 75  | 20  | 0   | 10  |
| Pseudoalteromonas | 165 | 61  | 108 | 68  | 24  | 16  | 0   | 40  |
| Pseudomonas       | 833 | 365 | 442 | 869 | 545 | 677 | 243 | 342 |
| Pseudovibrio      | 25  | 0   | 0   | 13  | 19  | 0   | 0   | 18  |
| Psychrobacter     | 46  | 17  | 22  | 29  | 16  | 0   | 0   | 14  |
| Psychroflexus     | 59  | 35  | 39  | 79  | 34  | 25  | 21  | 38  |
| Psychromonas      | 15  | 0   | 0   | 17  | 0   | 0   | 0   | 17  |
| Pyrobaculum       | 0   | 0   | 0   | 0   | 0   | 0   | 0   | 13  |
| Pyrococcus        | 0   | 0   | 0   | 12  | 13  | 0   | 0   | 29  |
| Ralstonia         | 178 | 78  | 93  | 478 | 142 | 85  | 42  | 101 |

|                      |     |     |     |     |     |     |     |     |
|----------------------|-----|-----|-----|-----|-----|-----|-----|-----|
| Reinekea             | 11  | 0   | 0   | 43  | 0   | 0   | 0   | 14  |
| Rhizobium            | 92  | 38  | 43  | 96  | 101 | 61  | 25  | 122 |
| Rhodobacter          | 22  | 13  | 21  | 52  | 15  | 46  | 31  | 121 |
| Rhodococcus          | 0   | 12  | 0   | 18  | 28  | 13  | 19  | 34  |
| Rhodoferax           | 34  | 15  | 28  | 77  | 58  | 27  | 89  | 261 |
| Rhodopirellula       | 28  | 39  | 31  | 54  | 84  | 31  | 32  | 138 |
| Rhodopseudomonas     | 33  | 21  | 14  | 46  | 62  | 44  | 33  | 112 |
| Rhodospirillum       | 25  | 18  | 0   | 39  | 48  | 46  | 11  | 47  |
| Rhodothermus         | 63  | 38  | 38  | 82  | 91  | 36  | 32  | 72  |
| Rickettsia           | 10  | 0   | 0   | 0   | 0   | 0   | 0   | 0   |
| Robiginitalea        | 54  | 25  | 33  | 60  | 48  | 18  | 16  | 31  |
| Roseburia            | 28  | 30  | 14  | 33  | 15  | 0   | 0   | 0   |
| Roseiflexus          | 163 | 151 | 92  | 221 | 277 | 62  | 31  | 146 |
| Roseobacter          | 23  | 17  | 13  | 42  | 27  | 28  | 20  | 50  |
| Roseovarius          | 16  | 0   | 0   | 23  | 17  | 16  | 13  | 52  |
| Rubroacter           | 26  | 0   | 0   | 21  | 83  | 10  | 0   | 32  |
| Ruegeria             | 0   | 0   | 0   | 14  | 0   | 15  | 0   | 24  |
| Ruminococcus         | 22  | 19  | 13  | 38  | 20  | 20  | 0   | 11  |
| Saccharophagus       | 15  | 0   | 13  | 26  | 15  | 15  | 0   | 23  |
| Saccharopolyspora    | 0   | 0   | 0   | 0   | 10  | 0   | 0   | 13  |
| Sagittula            | 0   | 0   | 0   | 0   | 10  | 0   | 0   | 13  |
| Salinibacter         | 18  | 13  | 0   | 38  | 23  | 0   | 0   | 13  |
| Salinispora          | 0   | 0   | 0   | 0   | 18  | 0   | 0   | 0   |
| Salmonella           | 286 | 122 | 111 | 171 | 153 | 75  | 10  | 0   |
| Sebaldella           | 13  | 0   | 10  | 13  | 0   | 0   | 0   | 0   |
| Selenomonas          | 26  | 22  | 0   | 53  | 15  | 17  | 0   | 0   |
| Serratia             | 12  | 0   | 0   | 13  | 11  | 0   | 0   | 0   |
| Shewanella           | 109 | 52  | 45  | 204 | 94  | 309 | 23  | 99  |
| Shigella             | 47  | 14  | 16  | 28  | 14  | 15  | 0   | 0   |
| Sideroxydans         | 35  | 21  | 14  | 44  | 32  | 21  | 72  | 143 |
| Sinorhizobium        | 20  | 16  | 12  | 37  | 44  | 43  | 0   | 42  |
| Sorangium            | 60  | 26  | 17  | 61  | 124 | 36  | 26  | 116 |
| Sphaerobacter        | 58  | 69  | 41  | 98  | 142 | 21  | 25  | 77  |
| Sphingobacterium     | 164 | 66  | 84  | 177 | 118 | 55  | 52  | 118 |
| Sphingobium          | 18  | 0   | 10  | 30  | 12  | 23  | 0   | 0   |
| Sphingomonas         | 82  | 43  | 22  | 73  | 111 | 90  | 16  | 74  |
| Sphingopyxis         | 39  | 14  | 12  | 28  | 25  | 34  | 11  | 39  |
| Spirosoma            | 234 | 85  | 121 | 192 | 301 | 76  | 103 | 267 |
| Stackebrandtia       | 0   | 0   | 0   | 11  | 11  | 0   | 0   | 0   |
| Staphylococcus       | 47  | 22  | 0   | 40  | 15  | 12  | 0   | 0   |
| Stenotrophomonas     | 44  | 108 | 14  | 53  | 18  | 45  | 61  | 82  |
| Stigmatella          | 46  | 23  | 14  | 46  | 73  | 26  | 14  | 78  |
| Streptococcus        | 38  | 28  | 24  | 52  | 35  | 21  | 0   | 17  |
| Streptomyces         | 52  | 26  | 22  | 61  | 91  | 37  | 16  | 72  |
| Streptosporangium    | 0   | 12  | 0   | 21  | 30  | 10  | 0   | 25  |
| Subdoligranulum      | 17  | 0   | 0   | 10  | 0   | 0   | 0   | 0   |
| Sulfitobacter        | 14  | 0   | 19  | 32  | 13  | 40  | 0   | 16  |
| Sulfolobus           | 0   | 0   | 0   | 0   | 12  | 0   | 0   | 13  |
| Sulfurihydrogenibium | 22  | 17  | 11  | 19  | 19  | 13  | 10  | 15  |
| Sulfurimonas         | 296 | 32  | 60  | 256 | 35  | 36  | 11  | 150 |
| Sulfurospirillum     | 120 | 18  | 22  | 112 | 106 | 48  | 0   | 24  |
| Sulfurovum           | 94  | 12  | 30  | 84  | 15  | 30  | 0   | 35  |

|                       |     |     |     |     |     |     |    |     |
|-----------------------|-----|-----|-----|-----|-----|-----|----|-----|
| Symbiobacterium       | 19  | 14  | 21  | 44  | 34  | 0   | 0  | 20  |
| Synechococcus         | 55  | 40  | 32  | 63  | 81  | 52  | 14 | 71  |
| Synechocystis         | 14  | 0   | 0   | 17  | 17  | 0   | 0  | 13  |
| Syntrophobacter       | 76  | 72  | 48  | 104 | 101 | 67  | 46 | 152 |
| Syntrophomonas        | 16  | 17  | 10  | 25  | 20  | 14  | 0  | 27  |
| Syntrophus            | 121 | 107 | 100 | 191 | 69  | 144 | 38 | 176 |
| Teredinibacter        | 0   | 0   | 12  | 17  | 0   | 12  | 0  | 20  |
| Thauera               | 60  | 30  | 22  | 108 | 58  | 89  | 26 | 74  |
| Thermanaerovibrio     | 28  | 17  | 13  | 50  | 0   | 71  | 0  | 0   |
| Thermoanaerobacter    | 42  | 36  | 32  | 58  | 52  | 22  | 10 | 55  |
| Thermoanaerobacterium | 22  | 14  | 10  | 23  | 17  | 12  | 0  | 15  |
| Thermobaculum         | 55  | 46  | 42  | 86  | 78  | 29  | 10 | 66  |
| Thermococcus          | 17  | 30  | 21  | 36  | 21  | 11  | 0  | 70  |
| Thermodesulfovibrio   | 10  | 22  | 0   | 35  | 31  | 16  | 19 | 88  |
| Thermofilum           | 0   | 0   | 0   | 0   | 0   | 0   | 0  | 15  |
| Thermomicrobium       | 24  | 40  | 23  | 68  | 62  | 15  | 0  | 31  |
| Thermomonospora       | 0   | 0   | 0   | 10  | 10  | 0   | 0  | 15  |
| Thermoplasma          | 0   | 0   | 0   | 0   | 0   | 0   | 0  | 11  |
| Thermosinus           | 24  | 22  | 20  | 32  | 41  | 36  | 0  | 47  |
| Thermosipho           | 0   | 0   | 11  | 24  | 0   | 0   | 0  | 0   |
| Thermotoga            | 30  | 19  | 20  | 47  | 16  | 16  | 0  | 41  |
| Thermus               | 15  | 12  | 0   | 21  | 26  | 10  | 0  | 14  |
| Thioalkalivibrio      | 17  | 25  | 11  | 52  | 28  | 28  | 22 | 74  |
| Thiobacillus          | 331 | 155 | 165 | 212 | 61  | 58  | 31 | 67  |
| Thiomicrospira        | 11  | 0   | 0   | 14  | 0   | 0   | 0  | 0   |
| Tolomonas             | 14  | 0   | 0   | 19  | 14  | 47  | 0  | 10  |
| Treponema             | 32  | 17  | 16  | 30  | 17  | 13  | 0  | 24  |
| Trichodesmium         | 0   | 0   | 0   | 13  | 20  | 0   | 0  | 11  |
| Variovorax            | 33  | 14  | 0   | 52  | 43  | 19  | 32 | 123 |
| Verminephrobacter     | 29  | 12  | 14  | 53  | 37  | 41  | 18 | 55  |
| Verrucomicrobium      | 89  | 37  | 57  | 128 | 95  | 91  | 56 | 375 |
| Vibrio                | 439 | 184 | 191 | 230 | 91  | 107 | 31 | 54  |
| Victivallis           | 20  | 25  | 24  | 29  | 19  | 25  | 0  | 28  |
| Wolinella             | 47  | 0   | 10  | 23  | 0   | 11  | 0  | 25  |
| Xanthobacter          | 10  | 0   | 0   | 16  | 20  | 15  | 0  | 26  |
| Xanthomonas           | 75  | 48  | 40  | 152 | 105 | 169 | 58 | 95  |
| Xylella               | 54  | 26  | 36  | 64  | 70  | 49  | 23 | 21  |
| Yersinia              | 169 | 86  | 85  | 116 | 55  | 42  | 12 | 25  |
| Zymomonas             | 50  | 21  | 19  | 80  | 33  | 37  | 0  | 0   |
