# Supplementary material for: Pyrosequencing of Antibiotic-Contaminated River Sediments Reveals High Levels of Resistance and Gene Transfer Elements
Source: PubMed Central journal article supplement (PMC3040208; doi:10.1371/journal.pone.0017038), 2011-02-16
Supplement: pone.0017038.s014.pdf [file pone.0017038.s014.pdf]

**Table S6**

| <b>GeneFamily</b> | <b>Coefficient</b> | <b>AIC</b> | <b>P-value</b> | <b>FDR</b> | <b>Annotation</b>                                                                           |
|-------------------|--------------------|------------|----------------|------------|---------------------------------------------------------------------------------------------|
| <b>COG0294</b>    | 3.41               | 888.22     | 0              | 0          | Dihydropteroate synthase and related enzymes                                                |
| <b>COG1109</b>    | 2.12               | 225.87     | 3.06E-55       | 5.89E-52   | Phosphomannomutase                                                                          |
| <b>COG3668</b>    | 1.41               | 184.85     | 2.00E-44       | 2.57E-41   | Plasmid stabilization system protein                                                        |
| <b>COG3570</b>    | 2.93               | 208.97     | 5.96E-43       | 5.73E-40   | Streptomycin 6-kinase                                                                       |
| <b>COG3231</b>    | 4.02               | 133.44     | 1.70E-37       | 1.31E-34   | Aminoglycoside phosphotransferase                                                           |
| <b>COG1357</b>    | -2.22              | 39.68      | 8.00E-26       | 5.13E-23   | Uncharacterized low-complexity proteins                                                     |
| <b>COG3108</b>    | -3.49              | 34.56      | 4.31E-14       | 2.37E-11   | Uncharacterized protein conserved in bacteria                                               |
| <b>COG0711</b>    | 1.43               | 58.55      | 2.83E-10       | 1.36E-07   | FOF1-type ATP synthase, subunit b                                                           |
| <b>COG0483</b>    | 1.71               | 184.36     | 3.80E-08       | 1.62E-05   | Archaeal fructose-1,6-bisphosphatase and related enzymes of inositol monophosphatase family |
| <b>COG5616</b>    | -2.02              | 32.57      | 8.47E-08       | 3.26E-05   | Predicted integral membrane protein                                                         |
| <b>COG3903</b>    | -2.05              | 36.50      | 4.16E-07       | 0.000146   | Predicted ATPase                                                                            |
| <b>COG0488</b>    | 0.64               | 64.95      | 1.83E-06       | 0.000588   | ATPase components of ABC transporters with duplicated ATPase domains                        |
| <b>COG5424</b>    | -21.79             | 13.86      | 6.00E-06       | 0.001777   | Pyrroloquinoline quinone (Coenzyme PQQ) biosynthesis protein C                              |
| <b>COG2026</b>    | -0.53              | 52.21      | 3.79E-05       | 0.010367   | Cytotoxic translational repressor of toxin-antitoxin stability system                       |
| <b>COG0823</b>    | -0.81              | 47.00      | 4.06E-05       | 0.010367   | Periplasmic component of the Tol biopolymer transport system                                |
| <b>COG3905</b>    | -1.62              | 28.82      | 4.58E-05       | 0.010367   | Predicted transcriptional regulator                                                         |
| <b>COG0820</b>    | 0.89               | 46.60      | 4.58E-05       | 0.010367   | Predicted Fe-S-cluster redox enzyme                                                         |
| <b>COG1961</b>    | -0.53              | 52.21      | 5.06E-05       | 0.010823   | Site-specific recombinases, DNA invertase Pin homologs                                      |
| <b>COG1801</b>    | -2.46              | 16.69      | 8.60E-05       | 0.017407   | Uncharacterized conserved protein                                                           |
| <b>COG1228</b>    | -1.12              | 34.09      | 9.68E-05       | 0.018621   | Imidazolonepropionase and related amidohydrolases                                           |
| <b>COG0155</b>    | 1.15               | 99.22      | 0.000104       | 0.019112   | Sulfite reductase, beta subunit (hemoprotein)                                               |
| <b>COG3119</b>    | -0.62              | 45.39      | 0.000148       | 0.025806   | Arylsulfatase A and related enzymes                                                         |
| <b>COG2984</b>    | -1.93              | 34.48      | 0.00017        | 0.027945   | ABC-type uncharacterized transport system, periplasmic                                      |

|                |        |       |          |          | component                                                                                                                |
|----------------|--------|-------|----------|----------|--------------------------------------------------------------------------------------------------------------------------|
| <b>COG0372</b> | -1.25  | 29.09 | 0.000174 | 0.027945 | Citrate synthase                                                                                                         |
| <b>COG5059</b> | 18.73  | 39.43 | 0.000192 | 0.029583 | Kinesin-like protein                                                                                                     |
| <b>COG5302</b> | -21.39 | 14.07 | 0.000219 | 0.031274 | Post-segregation antitoxin (ccd killing mechanism protein) encoded by the F plasmid                                      |
| <b>COG0610</b> | 0.97   | 35.32 | 0.000219 | 0.031274 | Type I site-specific restriction-modification system, R (restriction) subunit and related helicases                      |
| <b>COG1410</b> | -0.83  | 35.33 | 0.000232 | 0.031823 | Methionine synthase I, cobalamin-binding domain                                                                          |
| <b>COG1529</b> | -0.71  | 46.10 | 0.000284 | 0.03762  | Aerobic-type carbon monoxide dehydrogenase, large subunit CoxL/CutL homologs                                             |
| <b>COG3193</b> | -2.83  | 16.94 | 0.000365 | 0.046785 | Uncharacterized protein, possibly involved in utilization of glycolate and propanediol                                   |
| <b>COG1009</b> | -0.75  | 32.54 | 0.000422 | 0.052381 | NADH:ubiquinone oxidoreductase subunit 5 (chain L)/Multisubunit Na <sup>+</sup> /H <sup>+</sup> antiporter, MnhA subunit |
| <b>COG1917</b> | -1.60  | 33.01 | 0.000513 | 0.061628 | Uncharacterized conserved protein, contains double-stranded beta-helix domain                                            |
| <b>COG0665</b> | -1.11  | 27.16 | 0.000557 | 0.064961 | Glycine/D-amino acid oxidases (deaminating)                                                                              |
| <b>COG1075</b> | -25.20 | 9.61  | 0.000742 | 0.083245 | Predicted acetyltransferases and hydrolases with the alpha/beta hydrolase fold                                           |
| <b>COG2946</b> | -0.41  | 87.01 | 0.000757 | 0.083245 | Putative phage replication protein RstA                                                                                  |
| <b>COG2602</b> | 0.98   | 52.00 | 0.000888 | 0.091066 | Beta-lactamase class D                                                                                                   |
| <b>COG2352</b> | -1.96  | 19.78 | 0.000894 | 0.091066 | Phosphoenolpyruvate carboxylase                                                                                          |
| <b>COG0002</b> | -1.24  | 25.04 | 0.000923 | 0.091066 | Acetylglutamate semialdehyde dehydrogenase                                                                               |
| <b>COG2141</b> | -1.24  | 26.99 | 0.000923 | 0.091066 | Coenzyme F420-dependent N5,N10-methylene tetrahydromethanopterin reductase and related flavin-dependent oxidoreductases  |
