# Supplementary material for: Pyrosequencing of Antibiotic-Contaminated River Sediments Reveals High Levels of Resistance and Gene Transfer Elements
Source: PubMed Central journal article supplement (PMC3040208; doi:10.1371/journal.pone.0017038), 2011-02-16
Supplement: pone.0017038.s015.pdf [file pone.0017038.s015.pdf]

**Table S7**

| <b>GeneFamily</b> | <b>Coefficient</b> | <b>AIC</b> | <b>P-value</b> | <b>FDR</b> | <b>Annotation</b>                                                                 |
|-------------------|--------------------|------------|----------------|------------|-----------------------------------------------------------------------------------|
| <b>COG0553</b>    | -2.34              | 77.17      | 1.11E-26       | 4.29E-23   | Superfamily II DNA/RNA helicases, SNF2 family                                     |
| <b>COG2026</b>    | 2.35               | 31.91      | 2.75E-22       | 5.28E-19   | Cytotoxic translational repressor of toxin-antitoxin stability system             |
| <b>COG4710</b>    | 4.12               | 22.08      | 7.28E-19       | 9.34E-16   | Predicted DNA-binding protein with an HTH domain                                  |
| <b>COG5281</b>    | -20.58             | 36.22      | 1.07E-17       | 1.03E-14   | Phage-related minor tail protein                                                  |
| <b>COG1357</b>    | 2.31               | 28.97      | 4.27E-17       | 3.29E-14   | Uncharacterized low-complexity proteins                                           |
| <b>COG5527</b>    | 0.97               | 64.27      | 1.50E-16       | 9.61E-14   | Protein involved in initiation of plasmid replication                             |
| <b>COG0513</b>    | -1.36              | 47.51      | 1.78E-14       | 9.78E-12   | Superfamily II DNA and RNA helicases                                              |
| <b>COG3668</b>    | 2.07               | 23.11      | 6.28E-14       | 3.02E-11   | Plasmid stabilization system protein                                              |
| <b>COG1961</b>    | 1.33               | 45.82      | 8.28E-12       | 3.54E-09   | Site-specific recombinases, DNA invertase Pin homologs                            |
| <b>COG5655</b>    | 1.78               | 34.17      | 2.84E-10       | 1.09E-07   | Plasmid rolling circle replication initiator protein and truncated derivatives    |
| <b>COG2946</b>    | 1.03               | 49.51      | 1.55E-09       | 5.43E-07   | Putative phage replication protein RstA                                           |
| <b>COG3108</b>    | 3.35               | 32.18      | 8.67E-09       | 2.78E-06   | Uncharacterized protein conserved in bacteria                                     |
| <b>COG3378</b>    | 1.94               | 27.71      | 2.97E-08       | 8.80E-06   | Predicted ATPase                                                                  |
| <b>COG5534</b>    | 20.36              | 28.33      | 3.14E-07       | 8.63E-05   | Plasmid replication initiator protein                                             |
| <b>COG1192</b>    | 0.84               | 36.98      | 4.90E-07       | 0.000126   | ATPases involved in chromosome partitioning                                       |
| <b>COG0294</b>    | 1.42               | 21.82      | 3.53E-05       | 0.008489   | Dihydropteroate synthase and related enzymes                                      |
| <b>COG4886</b>    | -2.79              | 15.75      | 6.89E-05       | 0.015582   | Leucine-rich repeat (LRR) protein                                                 |
| <b>COG0532</b>    | -1.35              | 21.58      | 7.90E-05       | 0.016877   | Translation initiation factor 2 (IF-2; GTPase)                                    |
| <b>COG4983</b>    | 2.17               | 31.49      | 0.000134       | 0.027193   | Uncharacterized conserved protein                                                 |
| <b>COG1486</b>    | 21.76              | 13.28      | 0.000149       | 0.028596   | Alpha-galactosidases/6-phospho-beta-glucosidases, family 4 of glycosyl hydrolases |
| <b>COG3041</b>    | 2.63               | 16.46      | 0.000225       | 0.041265   | Uncharacterized protein conserved in bacteria                                     |
| <b>COG0817</b>    | 24.66              | 10.93      | 0.000298       | 0.049897   | Holliday junction resolvase, endonuclease subunit                                 |
| <b>COG1951</b>    | 23.66              | 11.30      | 0.000298       | 0.049897   | Tartrate dehydratase alpha subunit/Fumarate hydratase class I, N-terminal domain  |

|                |       |       |          |          |                                                 |
|----------------|-------|-------|----------|----------|-------------------------------------------------|
| <b>COG0069</b> | -1.56 | 18.68 | 0.000319 | 0.050641 | Glutamate synthase domain 2                     |
| <b>COG3696</b> | -0.57 | 31.02 | 0.000348 | 0.050641 | Putative silver efflux pump                     |
| <b>COG3505</b> | 1.82  | 23.84 | 0.000355 | 0.050641 | Type IV secretory pathway, VirD4 components     |
| <b>COG4942</b> | 1.82  | 19.60 | 0.000355 | 0.050641 | Membrane-bound metallopeptidase                 |
| <b>COG3598</b> | 2.06  | 21.62 | 0.000433 | 0.058479 | RecA-family ATPase                              |
| <b>COG0474</b> | -0.69 | 24.73 | 0.000441 | 0.058479 | Cation transport ATPase                         |
| <b>COG3905</b> | 1.77  | 22.52 | 0.000615 | 0.078811 | Predicted transcriptional regulator             |
| <b>COG3692</b> | 2.49  | 13.98 | 0.000789 | 0.095571 | Uncharacterized protein conserved in bacteria   |
| <b>COG1410</b> | 0.95  | 25.92 | 0.000795 | 0.095571 | Methionine synthase I, cobalamin-binding domain |
