# Supplementary material for: Pyrosequencing of Antibiotic-Contaminated River Sediments Reveals High Levels of Resistance and Gene Transfer Elements
Source: PubMed Central journal article supplement (PMC3040208; doi:10.1371/journal.pone.0017038), 2011-02-16
Supplement: pone.0017038.s016.pdf [file pone.0017038.s016.pdf]

**Table S8**

| <b>GeneFamily</b> | <b>Coefficient</b> | <b>AIC</b> | <b>P-value</b> | <b>FDR</b> | <b>Annotation</b>                                                              |
|-------------------|--------------------|------------|----------------|------------|--------------------------------------------------------------------------------|
| <b>COG0294</b>    | 4.83732            | 882.9636   | 0              | 0          | Dihydropteroate synthase and related enzymes                                   |
| <b>COG3668</b>    | 3.473867           | 179.9825   | 1.03E-90       | 1.98E-87   | Plasmid stabilization system protein                                           |
| <b>COG1109</b>    | 2.149108           | 224.3091   | 1.60E-52       | 2.05E-49   | Phosphomannomutase                                                             |
| <b>COG3570</b>    | 20.37122           | 202.1669   | 6.47E-52       | 6.22E-49   | Streptomycin 6-kinase                                                          |
| <b>COG0553</b>    | -2.44114           | 86.51388   | 2.69E-41       | 2.07E-38   | Superfamily II DNA/RNA helicases, SNF2 family                                  |
| <b>COG3231</b>    | 20.073             | 127.2489   | 5.55E-39       | 3.56E-36   | Aminoglycoside phosphotransferase                                              |
| <b>COG5281</b>    | -21.5854           | 36.21681   | 8.97E-28       | 4.93E-25   | Phage-related minor tail protein                                               |
| <b>COG5527</b>    | 1.076983           | 97.55947   | 3.66E-26       | 1.76E-23   | Protein involved in initiation of plasmid replication                          |
| <b>COG5655</b>    | 2.053102           | 53.74112   | 4.73E-18       | 2.02E-15   | Plasmid rolling circle replication initiator protein and truncated derivatives |
| <b>COG0711</b>    | 2.449213           | 55.00266   | 7.25E-16       | 2.79E-13   | FOF1-type ATP synthase, subunit b                                              |
| <b>COG0513</b>    | -1.03611           | 66.25597   | 4.67E-14       | 1.63E-11   | Superfamily II DNA and RNA helicases                                           |
| <b>COG4710</b>    | 3.645639           | 33.3332    | 1.19E-13       | 3.82E-11   | Predicted DNA-binding protein with an HTH domain                               |
| <b>COG2026</b>    | 1.828561           | 44.96162   | 2.82E-13       | 8.35E-11   | Cytotoxic translational repressor of toxin-antitoxin stability system          |
| <b>COG3328</b>    | 1.456498           | 46.78137   | 2.96E-10       | 8.12E-08   | Transposase and inactivated derivatives                                        |
| <b>COG1804</b>    | -1.52485           | 40.40488   | 1.26E-09       | 3.24E-07   | Predicted acyl-CoA transferases/carnitine dehydratase                          |
| <b>COG2602</b>    | 2.602289           | 48.50502   | 1.72E-08       | 4.14E-06   | Beta-lactamase class D                                                         |
| <b>COG0820</b>    | 1.211376           | 47.18473   | 7.36E-07       | 0.000167   | Predicted Fe-S-cluster redox enzyme                                            |
| <b>COG3598</b>    | 2.387178           | 29.99889   | 9.86E-07       | 0.000201   | RecA-family ATPase                                                             |
| <b>COG0243</b>    | -1.06531           | 32.6891    | 9.91E-07       | 0.000201   | Anaerobic dehydrogenases, typically selenocysteine-containing                  |
| <b>COG2352</b>    | -2.50567           | 19.66826   | 1.08E-06       | 0.000209   | Phosphoenolpyruvate carboxylase                                                |
| <b>COG1593</b>    | -1.39968           | 29.40679   | 2.26E-06       | 0.000414   | TRAP-type C4-dicarboxylate transport system, large permease component          |
| <b>COG3041</b>    | 2.857181           | 28.60766   | 2.88E-06       | 0.000504   | Uncharacterized protein conserved in bacteria                                  |

|                |          |          |          |          |                                                                                             |
|----------------|----------|----------|----------|----------|---------------------------------------------------------------------------------------------|
| <b>COG3333</b> | -1.79678 | 32.26377 | 3.14E-06 | 0.000525 | Uncharacterized protein conserved in bacteria                                               |
| <b>COG1028</b> | -0.5674  | 43.24647 | 4.89E-06 | 0.000784 | Dehydrogenases with different specificities (related to short-chain alcohol dehydrogenases) |
| <b>COG3181</b> | -0.91174 | 56.93775 | 6.61E-06 | 0.001017 | Uncharacterized protein conserved in bacteria                                               |
| <b>COG2060</b> | -2.37214 | 18.95494 | 8.92E-06 | 0.001319 | K <sup>+</sup> -transporting ATPase, A chain                                                |
| <b>COG0665</b> | -1.35495 | 30.00449 | 1.16E-05 | 0.001655 | Glycine/D-amino acid oxidases (deaminating)                                                 |
| <b>COG3590</b> | -1.99485 | 21.77857 | 1.50E-05 | 0.002059 | Predicted metalloendopeptidase                                                              |
| <b>COG4942</b> | 1.898331 | 30.48405 | 2.41E-05 | 0.003198 | Membrane-bound metallopeptidase                                                             |
| <b>COG0488</b> | 0.562759 | 63.00203 | 3.33E-05 | 0.004269 | ATPase components of ABC transporters with duplicated ATPase domains                        |
| <b>COG3378</b> | 1.45408  | 40.37061 | 3.86E-05 | 0.004788 | Predicted ATPase                                                                            |
| <b>COG4642</b> | 19.74466 | 30.68517 | 4.56E-05 | 0.00548  | Uncharacterized protein conserved in bacteria                                               |
| <b>COG1961</b> | 0.800554 | 45.58435 | 4.84E-05 | 0.005643 | Site-specific recombinases, DNA invertase Pin homologs                                      |
| <b>COG1008</b> | -1.01975 | 42.79718 | 5.36E-05 | 0.006066 | NADH:ubiquinone oxidoreductase subunit 4 (chain M)                                          |
| <b>COG3696</b> | -0.53416 | 42.04681 | 6.56E-05 | 0.007133 | Putative silver efflux pump                                                                 |
| <b>COG1883</b> | 20.70021 | 22.26912 | 6.68E-05 | 0.007133 | Na <sup>+</sup> -transporting methylmalonyl-CoA/oxaloacetate decarboxylase, beta subunit    |
| <b>COG0069</b> | -1.35779 | 24.88907 | 7.38E-05 | 0.007528 | Glutamate synthase domain 2                                                                 |
| <b>COG3164</b> | -3.02892 | 14.44343 | 7.44E-05 | 0.007528 | Predicted membrane protein                                                                  |
| <b>COG5276</b> | -2.01035 | 21.69716 | 8.88E-05 | 0.008594 | Uncharacterized conserved protein                                                           |
| <b>COG1290</b> | -1.42954 | 31.1688  | 8.94E-05 | 0.008594 | Cytochrome b subunit of the bc complex                                                      |
| <b>COG1845</b> | -1.21736 | 34.319   | 9.42E-05 | 0.008636 | Heme/copper-type cytochrome/quinol oxidase, subunit 3                                       |
| <b>COG1529</b> | -0.77454 | 44.06892 | 9.43E-05 | 0.008636 | Aerobic-type carbon monoxide dehydrogenase, large subunit CoxL/CutL homologs                |
| <b>COG1024</b> | -0.85523 | 32.20973 | 1.00E-04 | 0.008752 | Enoyl-CoA hydratase/carnithine racemase                                                     |

|                |          |          |          |          |                                                                                                                          |
|----------------|----------|----------|----------|----------|--------------------------------------------------------------------------------------------------------------------------|
| <b>COG1009</b> | -0.8317  | 35.79486 | 0.0001   | 0.008752 | NADH:ubiquinone oxidoreductase subunit 5 (chain L)/Multisubunit Na <sup>+</sup> /H <sup>+</sup> antiporter, MnhA subunit |
| <b>COG0861</b> | -1.25914 | 33.95779 | 0.000123 | 0.010545 | Membrane protein TerC, possibly involved in tellurium resistance                                                         |
| <b>COG0483</b> | 1.010072 | 187.6465 | 0.000145 | 0.012098 | Archaeal fructose-1,6-bisphosphatase and related enzymes of inositol monophosphatase family                              |
| <b>COG4941</b> | -22.4651 | 12.00655 | 0.000154 | 0.012643 | Predicted RNA polymerase sigma factor containing a TPR repeat domain                                                     |
| <b>COG2946</b> | 0.621086 | 83.26417 | 0.000172 | 0.013793 | Putative phage replication protein RstA                                                                                  |
| <b>COG0085</b> | -0.85837 | 32.44095 | 0.000244 | 0.01916  | DNA-directed RNA polymerase, beta subunit/140 kD subunit                                                                 |
| <b>COG1192</b> | 0.570769 | 43.12763 | 0.000251 | 0.019306 | ATPases involved in chromosome partitioning                                                                              |
| <b>COG4625</b> | -1.59384 | 27.53733 | 0.000261 | 0.019323 | Uncharacterized protein with a C-terminal OMP (outer membrane protein) domain                                            |
| <b>COG1734</b> | -1.59384 | 27.21696 | 0.000261 | 0.019323 | DnaK suppressor protein                                                                                                  |
| <b>COG0265</b> | -0.76716 | 33.48066 | 0.000274 | 0.01988  | Trypsin-like serine proteases, typically periplasmic, contain C-terminal PDZ domain                                      |
| <b>COG1149</b> | 21.49954 | 18.23877 | 0.00031  | 0.021288 | MinD superfamily P-loop ATPase containing an inserted ferredoxin domain                                                  |
| <b>COG2855</b> | 21.49954 | 18.92465 | 0.00031  | 0.021288 | Predicted membrane protein                                                                                               |
| <b>COG5059</b> | 18.49954 | 39.42822 | 0.00031  | 0.021288 | Kinesin-like protein                                                                                                     |
| <b>COG0043</b> | -1.26248 | 24.52076 | 0.000334 | 0.022565 | 3-polyprenyl-4-hydroxybenzoate decarboxylase and related decarboxylases                                                  |
| <b>COG0304</b> | -0.7306  | 36.47608 | 0.000357 | 0.023709 | 3-oxoacyl-(acyl-carrier-protein) synthase                                                                                |
| <b>COG4983</b> | 1.94089  | 30.97676 | 0.000368 | 0.023998 | Uncharacterized conserved protein                                                                                        |
| <b>COG1419</b> | -2.33578 | 18.22497 | 0.000409 | 0.026234 | Flagellar GTP-binding protein                                                                                            |
| <b>COG0863</b> | 1.055371 | 30.7231  | 0.000434 | 0.02739  | DNA modification methylase                                                                                               |
| <b>COG5534</b> | 20.44238 | 24.16563 | 0.000456 | 0.028118 | Plasmid replication initiator protein                                                                                    |

|                |          |          |          |          |                                                                                  |
|----------------|----------|----------|----------|----------|----------------------------------------------------------------------------------|
| <b>COG4948</b> | -0.93706 | 31.06455 | 0.000468 | 0.028118 | L-alanine-DL-glutamate epimerase and related enzymes of enolase superfamily      |
| <b>COG0583</b> | -0.67207 | 38.26443 | 0.000469 | 0.028118 | Transcriptional regulator                                                        |
| <b>COG4974</b> | 0.482378 | 62.81666 | 0.000475 | 0.028118 | Site-specific recombinase XerD                                                   |
| <b>COG1122</b> | 2.387178 | 28.50933 | 0.000538 | 0.031236 | ABC-type cobalt transport system, ATPase component                               |
| <b>COG1231</b> | -21.2828 | 10.12696 | 0.000552 | 0.031236 | Monoamine oxidase                                                                |
| <b>COG1462</b> | -20.2828 | 16.46142 | 0.000552 | 0.031236 | Uncharacterized protein involved in formation of curli polymers                  |
| <b>COG1005</b> | -0.86247 | 38.60624 | 0.000599 | 0.03342  | NADH:ubiquinone oxidoreductase subunit 1 (chain H)                               |
| <b>COG5616</b> | -1.52485 | 24.80144 | 0.000614 | 0.033764 | Predicted integral membrane protein                                              |
| <b>COG4805</b> | -1.60489 | 22.72097 | 0.000639 | 0.034293 | Uncharacterized protein conserved in bacteria                                    |
| <b>COG4972</b> | -1.70717 | 27.08625 | 0.000642 | 0.034293 | Tfp pilus assembly protein, ATPase PilM                                          |
| <b>COG0460</b> | -1.21119 | 27.61382 | 0.000695 | 0.036614 | Homoserine dehydrogenase                                                         |
| <b>COG1007</b> | -0.8317  | 34.30341 | 0.000721 | 0.037464 | NADH:ubiquinone oxidoreductase subunit 2 (chain N)                               |
| <b>COG1639</b> | 2.346356 | 21.16203 | 0.000761 | 0.039009 | Predicted signal transduction protein                                            |
| <b>COG0365</b> | -0.68712 | 35.41986 | 0.000913 | 0.046227 | Acyl-coenzyme A synthetases/AMP-(fatty) acid ligases                             |
| <b>COG0035</b> | 21.31722 | 18.6919  | 0.000993 | 0.048333 | Uracil phosphoribosyltransferase                                                 |
| <b>COG0817</b> | 21.31722 | 17.28319 | 0.000993 | 0.048333 | Holliday junction resolvase, endonuclease subunit                                |
| <b>COG1951</b> | 20.31722 | 21.02497 | 0.000993 | 0.048333 | Tartrate dehydratase alpha subunit/Fumarate hydratase class I, N-terminal domain |
| <b>COG0859</b> | -1.11938 | 27.52567 | 0.001037 | 0.049848 | ADP-heptose:LPS heptosyltransferase                                              |
| <b>COG1574</b> | -0.95953 | 28.87123 | 0.001137 | 0.053886 | Predicted metal-dependent hydrolase with the TIM-barrel fold                     |
| <b>COG1032</b> | -0.75374 | 30.27511 | 0.001149 | 0.053886 | Fe-S oxidoreductase                                                              |
| <b>COG0183</b> | -0.69817 | 35.13863 | 0.001165 | 0.053886 | Acetyl-CoA acetyltransferase                                                     |

|                |          |          |          |          |                                                                                                          |
|----------------|----------|----------|----------|----------|----------------------------------------------------------------------------------------------------------|
| <b>COG3320</b> | -2.21799 | 17.23922 | 0.001177 | 0.053886 | Putative dehydrogenase domain of multifunctional non-ribosomal peptide synthetases and related enzymes   |
| <b>COG2337</b> | 1.296533 | 30.78524 | 0.001239 | 0.056069 | Growth inhibitor                                                                                         |
| <b>COG0602</b> | -1.93031 | 20.16251 | 0.001445 | 0.064632 | Organic radical activating enzymes                                                                       |
| <b>COG4969</b> | 2.259344 | 38.46698 | 0.001515 | 0.067    | Tfp pilus assembly protein, major pilin PilA                                                             |
| <b>COG1999</b> | -1.62016 | 20.44168 | 0.001577 | 0.068152 | Uncharacterized protein SCO1/SenC/PrrC, involved in biogenesis of respiratory and photosynthetic systems |
| <b>COG2079</b> | -1.62016 | 21.47354 | 0.001577 | 0.068152 | Uncharacterized protein involved in propionate catabolism                                                |
| <b>COG1138</b> | -1.18    | 25.17271 | 0.001651 | 0.070584 | Cytochrome c biogenesis factor                                                                           |
| <b>COG1960</b> | -0.49523 | 35.77116 | 0.001891 | 0.077146 | Acyl-CoA dehydrogenases                                                                                  |
| <b>COG0412</b> | -1.20639 | 27.11187 | 0.001914 | 0.077146 | Dienelactone hydrolase and related enzymes                                                               |
| <b>COG1858</b> | -0.9783  | 32.05088 | 0.001936 | 0.077146 | Cytochrome c peroxidase                                                                                  |
| <b>COG2156</b> | -25.0597 | 8.998584 | 0.002005 | 0.077146 | K <sup>+</sup> -transporting ATPase, c chain                                                             |
| <b>COG3910</b> | -25.0597 | 8.998584 | 0.002005 | 0.077146 | Predicted ATPase                                                                                         |
| <b>COG2047</b> | -22.0597 | 9.382839 | 0.002005 | 0.077146 | Uncharacterized protein (ATP-grasp superfamily)                                                          |
| <b>COG3603</b> | -22.0597 | 9.382839 | 0.002005 | 0.077146 | Uncharacterized conserved protein                                                                        |
| <b>COG4648</b> | -22.0597 | 9.382839 | 0.002005 | 0.077146 | Predicted membrane protein                                                                               |
| <b>COG5257</b> | -22.0597 | 9.382839 | 0.002005 | 0.077146 | Translation initiation factor 2, gamma subunit (eIF-2gamma; GTPase)                                      |
| <b>COG1848</b> | -21.0597 | 13.77525 | 0.002005 | 0.077146 | Predicted nucleic acid-binding protein, contains PIN domain                                              |
| <b>COG3712</b> | 2.212824 | 23.40338 | 0.002137 | 0.081386 | Fe <sup>2+</sup> -dicitrate sensor, membrane component                                                   |
| <b>COG2814</b> | -0.64165 | 39.83976 | 0.002237 | 0.084027 | Arabinose efflux permease                                                                                |
| <b>COG3889</b> | -0.72348 | 29.75045 | 0.00225  | 0.084027 | Predicted solute binding protein                                                                         |
| <b>COG2761</b> | -2.62346 | 15.23113 | 0.002294 | 0.084519 | Predicted dithiol-disulfide isomerase involved in polyketide biosynthesis                                |
| <b>COG0535</b> | -0.98585 | 28.19528 | 0.002311 | 0.084519 | Predicted Fe-S                                                                                           |

|                |          |          |          |          | oxidoreductases                                                                         |
|----------------|----------|----------|----------|----------|-----------------------------------------------------------------------------------------|
| <b>COG0834</b> | 1.503677 | 24.35363 | 0.002329 | 0.084519 | ABC-type amino acid transport/signal transduction systems, periplasmic component/domain |
| <b>COG0372</b> | -1.08301 | 28.51916 | 0.002408 | 0.086568 | Citrate synthase                                                                        |
