# Supplementary material for: Pyrosequencing of Antibiotic-Contaminated River Sediments Reveals High Levels of Resistance and Gene Transfer Elements
Source: PubMed Central journal article supplement (PMC3040208; doi:10.1371/journal.pone.0017038), 2011-02-16
Supplement: pone.0017038.s017.pdf [file pone.0017038.s017.pdf]

**Table S9**

| <b>GeneFamily</b> | <b>Coefficient</b> | <b>AIC</b> | <b>P-value</b> | <b>FDR</b> | <b>Annotation</b>                                          |
|-------------------|--------------------|------------|----------------|------------|------------------------------------------------------------|
| <b>TIGR01496</b>  | -3.80              | 64.47      | 0              | 0          | dihydropteroate synthase                                   |
| <b>TIGR01455</b>  | -2.85              | 37.16      | 4.10E-94       | 5.89E-91   | phosphoglucosamine mutase                                  |
| <b>TIGR01629</b>  | 1.20               | 140.64     | 6.87E-30       | 6.57E-27   | phage/plasmid replication protein, gene II/X family        |
| <b>TIGR03434</b>  | 1.04               | 64.56      | 1.15E-11       | 8.26E-09   | Acidobacterial duplicated orphan permease                  |
| <b>TIGR01642</b>  | 1.04               | 35.96      | 4.88E-10       | 2.80E-07   | U2 snRNP auxilliary factor, large subunit, splicing factor |
| <b>TIGR02794</b>  | 0.80               | 48.41      | 1.31E-07       | 6.28E-05   | protein TolA                                               |
| <b>TIGR02763</b>  | -0.74              | 80.93      | 7.20E-07       | 0.000295   | scaffolding protein                                        |
| <b>TIGR02416</b>  | 21.86              | 13.50      | 1.29E-05       | 0.004627   | carbon-monoxide dehydrogenase, large subunit               |
| <b>TIGR02082</b>  | 0.99               | 28.69      | 2.99E-05       | 0.009437   | methionine synthase                                        |
| <b>TIGR00048</b>  | -1.01              | 42.28      | 3.29E-05       | 0.009437   | radical SAM enzyme, Cfr family                             |
| <b>TIGR03436</b>  | 2.05               | 28.49      | 7.14E-05       | 0.018616   | VWFA-related Acidobacterial domain                         |
| <b>TIGR01652</b>  | -19.92             | 21.58      | 9.13E-05       | 0.021837   | phospholipid-translocating P-type ATPase, flippase         |
| <b>TIGR01622</b>  | 1.01               | 25.02      | 0.000414       | 0.091362   | splicing factor, CC1-like family                           |
| <b>TIGR02294</b>  | 1.23               | 29.57      | 0.000454       | 0.093133   | nickel ABC transporter, periplasmic nickel-binding protein |
| <b>TIGR03619</b>  | 21.41              | 12.18      | 0.000502       | 0.093861   | probable F420-dependent oxidoreductase, Rv2161c family     |
| <b>TIGR02866</b>  | 1.70               | 24.37      | 0.000523       | 0.093861   | cytochrome c oxidase, subunit II                           |
| <b>TIGR00348</b>  | -1.03              | 27.08      | 0.000557       | 0.09407    | type I site-specific deoxyribonuclease, HsdR family        |
