# Supplementary material for: Pyrosequencing of Antibiotic-Contaminated River Sediments Reveals High Levels of Resistance and Gene Transfer Elements
Source: PubMed Central journal article supplement (PMC3040208; doi:10.1371/journal.pone.0017038), 2011-02-16
Supplement: pone.0017038.s018.pdf [file pone.0017038.s018.pdf]

**Table S10**

| <b>GeneFamily</b> | <b>Coefficient</b> | <b>AIC</b> | <b>P-value</b> | <b>FDR</b>  | <b>Annotation</b>                                                |
|-------------------|--------------------|------------|----------------|-------------|------------------------------------------------------------------|
| <b>TIGR01629</b>  | 2.07               | 134.70     | 2.26E-46       | 6.50E-43    | phage/plasmid replication protein. gene II/X family              |
| <b>TIGR02763</b>  | -1.53              | 439.16     | 2.51E-31       | 3.60E-28    | scaffolding protein                                              |
| <b>TIGR01541</b>  | -20.65             | 40.76      | 7.19E-19       | 6.87E-16    | phage tail tape measure protein. lambda family                   |
| <b>TIGR02794</b>  | 1.40               | 46.08      | 5.11E-13       | 3.66E-10    | protein TolA                                                     |
| <b>TIGR01389</b>  | -1.48              | 41.54      | 6.10E-12       | 3.50E-09    | ATP-dependent DNA helicase RecQ                                  |
| <b>TIGR01613</b>  | 2.01               | 27.02      | 4.86E-09       | 2.32E-06    | phage/plasmid primase. P4 family. C-terminal domain              |
| <b>TIGR02768</b>  | 0.77               | 87.62      | 9.43E-07       | 0.000386699 | Ti-type conjugative transfer relaxase TraA                       |
| <b>TIGR03453</b>  | 1.27               | 23.12      | 3.30E-06       | 0.001184891 | plasmid partitioning protein RepA                                |
| <b>TIGR02385</b>  | 2.44               | 26.75      | 4.64E-06       | 0.001374351 | addiction module toxin. RelE/StbE family                         |
| <b>TIGR01496</b>  | 1.54               | 21.28      | 4.79E-06       | 0.001374351 | dihydropteroate synthase                                         |
| <b>TIGR02419</b>  | -21.13             | 15.08      | 3.41E-05       | 0.008897982 | phage/conjugal plasmid C-4 type zinc finger protein. TraR family |
| <b>TIGR03434</b>  | 0.59               | 57.66      | 8.63E-05       | 0.019943037 | Acidobacterial duplicated orphan permease                        |
| <b>TIGR02668</b>  | -2.75              | 17.56      | 9.04E-05       | 0.019943037 | probable molybdenum cofactor biosynthesis protein A              |
| <b>TIGR02680</b>  | 0.93               | 23.33      | 0.000178465    | 0.034786634 | conserved hypothetical protein TIGR02680                         |
| <b>TIGR00487</b>  | -1.24              | 22.28      | 0.000181875    | 0.034786634 | translation initiation factor IF-2                               |
| <b>TIGR02601</b>  | -1.47              | 21.75      | 0.000255605    | 0.045833256 | autotransporter-associated beta strand repeat                    |
| <b>TIGR02168</b>  | 0.84               | 23.06      | 0.000300892    | 0.05077996  | chromosome segregation protein SMC                               |
| <b>TIGR02745</b>  | -2.61              | 16.39      | 0.0003575      | 0.056981548 | cytochrome c oxidase accessory protein CcoG                      |
| <b>TIGR02188</b>  | -1.00              | 21.13      | 0.000493602    | 0.073031938 | acetate--CoA ligase                                              |
| <b>TIGR00228</b>  | 24.61              | 10.77      | 0.000509111    | 0.073031938 | crossover junction endodeoxyribonuclease RuvC                    |
