# Supplementary material for: Pyrosequencing of Antibiotic-Contaminated River Sediments Reveals High Levels of Resistance and Gene Transfer Elements
Source: PubMed Central journal article supplement (PMC3040208; doi:10.1371/journal.pone.0017038), 2011-02-16
Supplement: pone.0017038.s019.pdf [file pone.0017038.s019.pdf]

**Table S11**

| <b>GeneFamily</b> | <b>Coefficient</b> | <b>AIC</b> | <b>P-value</b> | <b>FDR</b> | <b>Annotation</b>                                                |
|-------------------|--------------------|------------|----------------|------------|------------------------------------------------------------------|
| <b>TIGR01496</b>  | 5.34               | 59.73      | 0              | 0          | dihydropteroate synthase                                         |
| <b>TIGR01455</b>  | 2.95               | 36.03      | 2.71E-93       | 3.88E-90   | phosphoglucosamine mutase                                        |
| <b>TIGR01541</b>  | -21.52             | 40.76      | 4.24E-23       | 4.05E-20   | phage tail tape measure protein, lambda family                   |
| <b>TIGR02763</b>  | -0.79              | 429.60     | 4.96E-15       | 3.56E-12   | scaffolding protein                                              |
| <b>TIGR01642</b>  | -1.19              | 42.75      | 2.70E-13       | 1.55E-10   | U2 snRNP auxilliary factor, large subunit, splicing factor       |
| <b>TIGR01389</b>  | -1.34              | 51.80      | 1.68E-12       | 8.04E-10   | ATP-dependent DNA helicase RecQ                                  |
| <b>TIGR02768</b>  | 0.95               | 54.19      | 1.73E-11       | 7.09E-09   | Ti-type conjugative transfer relaxase TraA                       |
| <b>TIGR02168</b>  | 1.29               | 29.60      | 4.77E-11       | 1.71E-08   | chromosome segregation protein SMC                               |
| <b>TIGR00048</b>  | 1.29               | 42.98      | 1.16E-06       | 0.00037    | radical SAM enzyme, Cfr family                                   |
| <b>TIGR02601</b>  | -1.97              | 24.57      | 1.81E-06       | 0.00052    | autotransporter-associated beta strand repeat                    |
| <b>TIGR01629</b>  | 0.87               | 35.57      | 2.56E-06       | 0.000626   | phage/plasmid replication protein, gene II/X family              |
| <b>TIGR03253</b>  | -1.60              | 31.83      | 2.62E-06       | 0.000626   | formyl-CoA transferase                                           |
| <b>TIGR02419</b>  | -21.00             | 15.08      | 3.77E-06       | 0.000833   | phage/conjugal plasmid C-4 type zinc finger protein, TraR family |
| <b>TIGR00786</b>  | -1.40              | 27.81      | 6.15E-06       | 0.001261   | TRAP transporter, DctM subunit                                   |
| <b>TIGR03194</b>  | -1.53              | 26.28      | 9.72E-06       | 0.00186    | 4-hydroxybenzoyl-CoA reductase, alpha subunit                    |
| <b>TIGR02037</b>  | -0.98              | 27.61      | 1.05E-05       | 0.001882   | protease Do                                                      |
| <b>TIGR00601</b>  | -1.06              | 33.19      | 1.17E-05       | 0.001982   | UV excision repair protein Rad23                                 |
| <b>TIGR02385</b>  | 2.28               | 27.63      | 1.74E-05       | 0.00278    | addiction module toxin, RelE/StbE family                         |
| <b>TIGR01613</b>  | 1.48               | 36.32      | 7.09E-05       | 0.01071    | phage/plasmid primase, P4 family, C-terminal domain              |
| <b>TIGR02866</b>  | -1.87              | 26.61      | 8.57E-05       | 0.012292   | cytochrome c oxidase, subunit II                                 |
| <b>TIGR03436</b>  | -2.04              | 18.04      | 0.000102       | 0.013951   | VWFA-related Acidobacterial domain                               |
| <b>TIGR01972</b>  | -0.91              | 29.89      | 0.000152       | 0.019126   | proton-translocating NADH-quinone oxidoreductase, chain M        |
| <b>TIGR02416</b>  | -22.59             | 10.53      | 0.00016        | 0.019126   | carbon-monoxide dehydrogenase, large subunit                     |
| <b>TIGR02621</b>  | -20.59             | 12.43      | 0.00016        | 0.019126   | CRISPR-associated helicase Cas3, Anaes-subtype                   |
| <b>TIGR02099</b>  | -2.76              | 15.55      | 0.000207       | 0.023226   | conserved hypothetical protein TIGR02099                         |
| <b>TIGR01109</b>  | 20.66              | 17.85      | 0.00021        | 0.023226   | sodium ion-translocating decarboxylase, beta subunit             |
| <b>TIGR00680</b>  | -2.23              | 16.77      | 0.00024        | 0.025203   | K <sup>+</sup> -transporting ATPase, A subunit                   |

|                  |        |       |          |          |                                                                                   |
|------------------|--------|-------|----------|----------|-----------------------------------------------------------------------------------|
| <b>TIGR03453</b> | 1.01   | 27.85 | 0.000246 | 0.025203 | plasmid partitioning protein RepA                                                 |
| <b>TIGR01830</b> | -0.54  | 35.07 | 0.000295 | 0.029205 | 3-oxoacyl-[acyl-carrier-protein] reductase                                        |
| <b>TIGR03365</b> | -22.46 | 11.38 | 0.000414 | 0.039559 | 7-cyano-7-deazaguanosine (preQ0) biosynthesis protein QueE                        |
| <b>TIGR03339</b> | -1.41  | 22.45 | 0.000499 | 0.046174 | aminoethylphosphonate catabolism associated LysR family transcriptional regulator |
| <b>TIGR02169</b> | 0.92   | 29.30 | 0.000689 | 0.061764 | chromosome segregation protein SMC                                                |
| <b>TIGR02668</b> | -1.68  | 21.16 | 0.000739 | 0.064208 | probable molybdenum cofactor biosynthesis protein A                               |
| <b>TIGR01770</b> | -0.88  | 31.64 | 0.00081  | 0.066386 | proton-translocating NADH-quinone oxidoreductase, chain N                         |
| <b>TIGR03207</b> | -0.88  | 27.71 | 0.00081  | 0.066386 | cyclohexanecarboxyl-CoA dehydrogenase                                             |
| <b>TIGR01127</b> | 2.41   | 17.26 | 0.000873 | 0.068709 | threonine dehydratase                                                             |
| <b>TIGR02013</b> | -0.83  | 27.67 | 0.000886 | 0.068709 | DNA-directed RNA polymerase, beta subunit                                         |
| <b>TIGR02224</b> | 0.66   | 45.52 | 0.00102  | 0.075942 | tyrosine recombinase XerC                                                         |
| <b>TIGR01571</b> | -23.30 | 10.12 | 0.001078 | 0.075942 | uncharacterized Cys-rich domain                                                   |
| <b>TIGR02435</b> | -23.30 | 10.12 | 0.001078 | 0.075942 | precorrin-3B synthase                                                             |
| <b>TIGR01085</b> | 1.28   | 24.51 | 0.001106 | 0.075942 | UDP-N-acetylmuramyl-tripeptide synthetases                                        |
| <b>TIGR03329</b> | -2.56  | 18.10 | 0.001139 | 0.075942 | putative aminophosphonate oxidoreductase                                          |
| <b>TIGR01845</b> | -1.10  | 27.16 | 0.001139 | 0.075942 | efflux transporter, outer membrane factor (OMF) lipoprotein, NodT family          |
| <b>TIGR01929</b> | -2.07  | 21.18 | 0.001165 | 0.075942 | naphthoate synthase                                                               |
| <b>TIGR01974</b> | -0.74  | 32.89 | 0.001444 | 0.09204  | proton-translocating NADH-quinone oxidoreductase, chain L                         |
