# Supplementary material for: Pyrosequencing of Antibiotic-Contaminated River Sediments Reveals High Levels of Resistance and Gene Transfer Elements
Source: PubMed Central journal article supplement (PMC3040208; doi:10.1371/journal.pone.0017038), 2011-02-16
Supplement: pone.0017038.s020.pdf [file pone.0017038.s020.pdf]

Table S12

| ID           | Indian WWTP<br>Downstream 1 | Indian WWTP<br>Downstream 2 | Indian WWTP<br>Downstream 3 | Indian WWTP<br>Discharge site | Indian WWT<br>Upstream 1 | Indian WWTP<br>Upstream 2 | Swedish WWTP<br>Downstream | Swedish WWTP<br>Upstream | Total | Gene      | Resistance             |
|--------------|-----------------------------|-----------------------------|-----------------------------|-------------------------------|--------------------------|---------------------------|----------------------------|--------------------------|-------|-----------|------------------------|
| ARGENE000142 | 1119                        | 490                         | 489                         | 129                           | 9                        | 12                        | 0                          | 0                        | 2248  | sul2      | Sulfonamide            |
| ARGENE000144 | 185                         | 66                          | 78                          | 8                             | 3                        | 7                         | 0                          | 0                        | 347   | aph6id    | Streptomycin           |
| ARGENE000034 | 139                         | 47                          | 58                          | 9                             | 0                        | 3                         | 0                          | 0                        | 256   | aph33ib   | Streptomycin           |
| ARGENE000272 | 15                          | 3                           | 8                           | 12                            | 24                       | 12                        | 6                          | 25                       | 105   | Baca      | Bacitracin             |
| ARGENE200007 | 1                           | 1                           | 0                           | 1                             | 44                       | 1                         | 0                          | 0                        | 48    | qnrD      | Fluoroquinolone        |
| ARGENE200006 | 0                           | 0                           | 1                           | 0                             | 21                       | 13                        | 0                          | 0                        | 35    | qnrVC     | Fluoroquinolone        |
| ARGENE000026 | 1                           | 0                           | 1                           | 3                             | 3                        | 5                         | 0                          | 0                        | 13    | bl1_cmy2  | Beta-lactam class C    |
| ARGENE000107 | 0                           | 0                           | 0                           | 1                             | 3                        | 9                         | 0                          | 0                        | 13    | bl2_ges   | Beta-lactam class A    |
| ARGENE200008 | 0                           | 0                           | 0                           | 2                             | 5                        | 6                         | 0                          | 0                        | 13    | qnrS      | Fluoroquinolone        |
| ARGENE000244 | 0                           | 0                           | 0                           | 2                             | 5                        | 3                         | 0                          | 0                        | 10    | ant3ia    | Aminoglycosides        |
| ARGENE000043 | 7                           | 0                           | 1                           | 0                             | 0                        | 1                         | 0                          | 0                        | 9     | dfra15    | Trimethoprim           |
| ARGENE000141 | 0                           | 2                           | 2                           | 2                             | 0                        | 0                         | 0                          | 0                        | 6     | sul1      | Sulfonamide            |
| ARGENE000134 | 0                           | 0                           | 0                           | 0                             | 0                        | 0                         | 0                          | 6                        | 6     | aac3iia   | Aminoglycosides        |
| ARGENE000220 | 2                           | 0                           | 0                           | 0                             | 4                        | 0                         | 0                          | 0                        | 6     | tsnr      | Thiostrepton           |
| ARGENE000171 | 0                           | 0                           | 1                           | 1                             | 0                        | 1                         | 0                          | 0                        | 3     | aac6ib    | Aminoglycosides        |
| ARGENE000321 | 1                           | 0                           | 0                           | 0                             | 0                        | 2                         | 0                          | 0                        | 3     | acrb      | Multidrug efflux pump  |
| ARGENE000376 | 1                           | 0                           | 0                           | 0                             | 0                        | 1                         | 0                          | 0                        | 2     | tetc      | Tetracycline           |
| ARGENE000164 | 0                           | 1                           | 0                           | 0                             | 1                        | 0                         | 0                          | 0                        | 2     | bl3_shw   | Beta-lactam class B    |
| ARGENE000375 | 0                           | 0                           | 0                           | 0                             | 2                        | 0                         | 0                          | 0                        | 2     | teta      | Tetracycline           |
| ARGENE000343 | 0                           | 0                           | 0                           | 0                             | 1                        | 1                         | 0                          | 0                        | 2     | ceob      | Chloramphenicol        |
| ARGENE000276 | 0                           | 0                           | 0                           | 1                             | 0                        | 0                         | 0                          | 0                        | 1     | ermf      | Macrolide              |
| ARGENE000274 | 0                           | 0                           | 1                           | 0                             | 0                        | 0                         | 0                          | 0                        | 1     | ermc      | Macrolide              |
| ARGENE000266 | 1                           | 0                           | 0                           | 0                             | 0                        | 0                         | 0                          | 0                        | 1     | mexb      | Multidrug efflux pump  |
| ARGENE000259 | 0                           | 0                           | 0                           | 1                             | 0                        | 0                         | 0                          | 0                        | 1     | mexw      | Multidrug efflux pump  |
| ARGENE000252 | 1                           | 0                           | 0                           | 0                             | 0                        | 0                         | 0                          | 0                        | 1     | mpha      | Macrolide              |
| ARGENE000185 | 0                           | 0                           | 0                           | 1                             | 0                        | 0                         | 0                          | 0                        | 1     | bl2c_pse1 | Beta-lactam class A    |
| ARGENE000166 | 0                           | 1                           | 0                           | 0                             | 0                        | 0                         | 0                          | 0                        | 1     | ant2ia    | Aminoglycosides        |
| ARGENE000153 | 0                           | 1                           | 0                           | 0                             | 0                        | 0                         | 0                          | 0                        | 1     | bl2d_lcr1 | Beta-lactam class D    |
| ARGENE000081 | 0                           | 1                           | 0                           | 0                             | 0                        | 0                         | 0                          | 0                        | 1     | bl2d_oxa2 | Beta-lactamase class D |
| ARGENE000361 | 0                           | 0                           | 0                           | 0                             | 0                        | 1                         | 0                          | 0                        | 1     | tetq      | Tetracycline           |
| ARGENE000339 | 0                           | 0                           | 0                           | 0                             | 1                        | 0                         | 0                          | 0                        | 1     | arna      | Polymyxin              |
| ARGENE000316 | 0                           | 0                           | 0                           | 0                             | 1                        | 0                         | 0                          | 0                        | 1     | macb      | Macrolide              |

|                     |      |     |     |     |     |    |   |    |      |        |                        |
|---------------------|------|-----|-----|-----|-----|----|---|----|------|--------|------------------------|
| <b>ARGENE000262</b> | 0    | 0   | 0   | 0   | 1   | 0  | 0 | 0  | 1    | mexi   | Multidrug efflux pump  |
| <b>ARGENE000187</b> | 0    | 0   | 0   | 0   | 0   | 1  | 0 | 0  | 1    | erea   | Macrolide              |
| <b>ARGENE000182</b> | 0    | 0   | 0   | 0   | 0   | 1  | 0 | 0  | 1    | bl1_sm | Beta-lactamase class C |
| <b>ARGENE000158</b> | 0    | 0   | 0   | 0   | 0   | 1  | 0 | 0  | 1    | dfrb1  | Trimethoprim           |
| <b>ARGENE000115</b> | 0    | 0   | 0   | 0   | 0   | 1  | 0 | 0  | 1    | catb3  | Chloramphenicol        |
| <b>Total</b>        | 1473 | 613 | 640 | 172 | 128 | 79 | 6 | 31 | 3146 |        |                        |
