# Supplementary material for: Pyrosequencing of Antibiotic-Contaminated River Sediments Reveals High Levels of Resistance and Gene Transfer Elements
Source: PubMed Central journal article supplement (PMC3040208; doi:10.1371/journal.pone.0017038), 2011-02-16
Supplement: pone.0017038.s021.pdf [file pone.0017038.s021.pdf]

Table S13

| ID           | Indian WWTP<br>Downstream 1 | Indian WWTP<br>Downstream 2 | Indian WWTP<br>Downstream 3 | Indian WWTP<br>Discharge site | Indian WWTP<br>Upstream 1 | Indian WWTP<br>Upstream 2 | Swedish WWTP<br>Upstream | Swedish WWTP<br>Downstream | Total | Gene/Element                   |
|--------------|-----------------------------|-----------------------------|-----------------------------|-------------------------------|---------------------------|---------------------------|--------------------------|----------------------------|-------|--------------------------------|
| ARGENE400003 | 113                         | 94                          | 47                          | 32                            | 4                         | 3                         | 0                        | 1                          | 294   | ISCR2 transposase <sup>a</sup> |
| ARGENE100006 | 47                          | 21                          | 23                          | 5                             | 4                         | 5                         | 1                        | 0                          | 106   | intI1                          |
| ARGENE302403 | 0                           | 38                          | 5                           | 15                            | 1                         | 0                         | 0                        | 0                          | 59    | ISVsa3 (IS91) <sup>a</sup>     |
| ARGENE301609 | 1                           | 1                           | 2                           | 6                             | 5                         | 2                         | 0                        | 0                          | 17    | ISSod9 (Tn3)                   |
| ARGENE301612 | 4                           | 2                           | 2                           | 2                             | 2                         | 1                         | 0                        | 1                          | 14    | ISSod4 (IS256)                 |
| ARGENE301864 | 3                           | 3                           | 0                           | 2                             | 1                         | 1                         | 0                        | 0                          | 10    | ISXax1 (IS256)                 |
| ARGENE300568 | 2                           | 2                           | 1                           | 2                             | 0                         | 1                         | 1                        | 0                          | 9     | ISShma11 (ISL3)                |
| ARGENE302383 | 1                           | 2                           | 0                           | 4                             | 0                         | 0                         | 0                        | 0                          | 7     | ISSba16 (IS30)                 |
| ARGENE301407 | 0                           | 1                           | 1                           | 0                             | 1                         | 4                         | 0                        | 0                          | 7     | ISCARN40 (IS256)               |
| ARGENE300983 | 1                           | 0                           | 2                           | 2                             | 0                         | 2                         | 0                        | 0                          | 7     | IS1071 (Tn3)                   |
| ARGENE300971 | 0                           | 1                           | 0                           | 3                             | 0                         | 2                         | 0                        | 0                          | 6     | ISEcp1 (IS1380)                |
| ARGENE301785 | 0                           | 0                           | 0                           | 1                             | 1                         | 4                         | 0                        | 0                          | 6     | IS3000 (Tn3)                   |
| ARGENE100009 | 0                           | 0                           | 2                           | 1                             | 0                         | 2                         | 0                        | 0                          | 5     | Unspecified integrase          |
| ARGENE301280 | 0                           | 0                           | 0                           | 0                             | 0                         | 0                         | 1                        | 4                          | 5     | ISAzo18 (IS3)                  |
| ARGENE301441 | 0                           | 1                           | 0                           | 0                             | 0                         | 2                         | 1                        | 1                          | 5     | ISArsp6 (Tn3)                  |
| ARGENE300818 | 1                           | 1                           | 1                           | 1                             | 0                         | 0                         | 0                        | 0                          | 4     | IS6100 (IS6)                   |
| ARGENE300748 | 1                           | 1                           | 0                           | 0                             | 0                         | 2                         | 0                        | 0                          | 4     | ISEnca1 (IS1380)               |
| ARGENE302333 | 1                           | 0                           | 0                           | 1                             | 0                         | 1                         | 0                        | 1                          | 4     | ISSsp5 (IS21)                  |
| ARGENE300310 | 2                           | 1                           | 1                           | 0                             | 0                         | 0                         | 0                        | 0                          | 4     | IS26 (IS6)                     |
| ARGENE300494 | 0                           | 0                           | 0                           | 0                             | 0                         | 1                         | 0                        | 2                          | 3     | ISAzvi2 (IS110)                |
| ARGENE301511 | 1                           | 0                           | 0                           | 0                             | 0                         | 0                         | 0                        | 2                          | 3     | IS1086 (IS30)                  |
| ARGENE301199 | 1                           | 2                           | 0                           | 0                             | 0                         | 0                         | 0                        | 0                          | 3     | ISMsi3 (IS3)                   |
| ARGENE301178 | 0                           | 2                           | 0                           | 1                             | 0                         | 0                         | 0                        | 0                          | 3     | ISMasp7 (IS1380)               |
| ARGENE300023 | 1                           | 0                           | 0                           | 0                             | 1                         | 1                         | 0                        | 0                          | 3     | ISThsp5 (IS21)                 |
| ARGENE301897 | 1                           | 0                           | 0                           | 1                             | 0                         | 1                         | 0                        | 0                          | 3     | IS1247 (IS1380)                |
| ARGENE300311 | 0                           | 0                           | 0                           | 0                             | 1                         | 0                         | 0                        | 2                          | 3     | ISMex28 (IS5)                  |
| ARGENE301045 | 0                           | 1                           | 0                           | 1                             | 1                         | 0                         | 0                        | 0                          | 3     | ISCARN27 (IS256)               |
| ARGENE302561 | 0                           | 0                           | 0                           | 3                             | 0                         | 0                         | 0                        | 0                          | 3     | ISPpu12 (ISL3)                 |
| ARGENE301455 | 0                           | 0                           | 0                           | 0                             | 0                         | 0                         | 0                        | 3                          | 3     | ISAzo28 (IS110)                |
| ARGENE302158 | 3                           | 0                           | 0                           | 0                             | 0                         | 0                         | 0                        | 0                          | 3     | ISSse3 (IS3)                   |
| ARGENE301980 | 1                           | 0                           | 0                           | 0                             | 0                         | 1                         | 0                        | 1                          | 3     | ISCARN70 (IS4)                 |
| ARGENE301675 | 0                           | 0                           | 0                           | 2                             | 0                         | 1                         | 0                        | 0                          | 3     | IS1419 (IS481)                 |
| ARGENE301721 | 0                           | 0                           | 0                           | 0                             | 0                         | 1                         | 1                        | 0                          | 2     | ISPps1 (IS91)                  |
| ARGENE300954 | 0                           | 0                           | 0                           | 0                             | 0                         | 0                         | 1                        | 1                          | 2     | ISXau2 (IS3)                   |
| ARGENE302116 | 1                           | 0                           | 0                           | 0                             | 0                         | 0                         | 1                        | 0                          | 2     | ISPpu7 (IS21)                  |
| ARGENE300390 | 0                           | 0                           | 0                           | 1                             | 1                         | 0                         | 0                        | 0                          | 2     | IS881 (IS5)                    |
| ARGENE300394 | 0                           | 0                           | 0                           | 1                             | 0                         | 1                         | 0                        | 0                          | 2     | IS5 (IS5)                      |
| ARGENE301282 | 0                           | 0                           | 0                           | 0                             | 0                         | 0                         | 1                        | 1                          | 2     | ISAzo10 (IS3)                  |
| ARGENE301625 | 0                           | 0                           | 1                           | 0                             | 0                         | 0                         | 0                        | 1                          | 2     | ISMch1 (IS3)                   |

|              |   |   |   |   |   |   |   |   |   |                        |
|--------------|---|---|---|---|---|---|---|---|---|------------------------|
| ARGENE302128 | 1 | 0 | 0 | 0 | 0 | 1 | 0 | 0 | 2 | ISXac3 (IS3)           |
| ARGENE301344 | 0 | 0 | 0 | 1 | 1 | 0 | 0 | 0 | 2 | ISCte3 (IS3)           |
| ARGENE302286 | 0 | 0 | 0 | 0 | 0 | 0 | 0 | 2 | 2 | ISAz09 (IS630)         |
| ARGENE301639 | 0 | 0 | 1 | 0 | 0 | 0 | 0 | 1 | 2 | ISBmu3 (IS21)          |
| ARGENE301084 | 0 | 0 | 0 | 0 | 0 | 0 | 1 | 1 | 2 | ISMdi21 (IS5)          |
| ARGENE300823 | 0 | 0 | 0 | 1 | 0 | 1 | 0 | 0 | 2 | ISKpn10 (IS3)          |
| ARGENE302507 | 0 | 0 | 0 | 0 | 0 | 1 | 0 | 1 | 2 | ISPosp7 (IS1380)       |
| ARGENE300981 | 0 | 1 | 0 | 0 | 0 | 0 | 0 | 1 | 2 | ISDar2 (IS4)           |
| ARGENE300036 | 0 | 0 | 1 | 0 | 0 | 1 | 0 | 0 | 2 | ISIl012 (IS3)          |
| ARGENE301619 | 1 | 0 | 0 | 0 | 1 | 0 | 0 | 0 | 2 | ISEca11 (IS3)          |
| ARGENE301767 | 0 | 0 | 0 | 0 | 1 | 0 | 0 | 1 | 2 | ISSpma1 (IS3)          |
| ARGENE302515 | 0 | 0 | 0 | 0 | 0 | 1 | 0 | 1 | 2 | ISNeu4 (IS3)           |
| ARGENE300020 | 1 | 0 | 0 | 0 | 0 | 1 | 0 | 0 | 2 | ISThsp2 (IS21)         |
| ARGENE300599 | 0 | 0 | 0 | 1 | 0 | 0 | 0 | 1 | 2 | ISPre1 (IS5)           |
| ARGENE300597 | 0 | 0 | 0 | 0 | 0 | 0 | 0 | 2 | 2 | ISPre3 (IS66)          |
| ARGENE300689 | 2 | 0 | 0 | 0 | 0 | 0 | 0 | 0 | 2 | IS1541C (IS200/IS605)  |
| ARGENE301086 | 0 | 0 | 0 | 0 | 1 | 1 | 0 | 0 | 2 | ISMdi25 (IS30)         |
| ARGENE300716 | 1 | 0 | 0 | 0 | 0 | 0 | 0 | 1 | 2 | ISGdi8 (IS256)         |
| ARGENE302327 | 0 | 0 | 1 | 0 | 0 | 0 | 0 | 1 | 2 | ISPPu22 (IS3)          |
| ARGENE300161 | 0 | 0 | 0 | 2 | 0 | 0 | 0 | 0 | 2 | ISAd4 (IS3)            |
| ARGENE301965 | 1 | 0 | 0 | 0 | 0 | 1 | 0 | 0 | 2 | ISPme1 (IS1380)        |
| ARGENE302201 | 0 | 0 | 0 | 0 | 0 | 1 | 0 | 1 | 2 | ISApr6 (IS66)          |
| ARGENE302334 | 0 | 0 | 1 | 0 | 0 | 0 | 0 | 1 | 2 | ISSsp2 (IS3)           |
| ARGENE302332 | 1 | 0 | 1 | 0 | 0 | 0 | 0 | 0 | 2 | ISSsp4 (IS21)          |
| ARGENE302537 | 1 | 0 | 0 | 0 | 0 | 1 | 0 | 0 | 2 | ISEli1 (IS3)           |
| ARGENE300777 | 0 | 0 | 0 | 0 | 0 | 0 | 1 | 1 | 2 | ISPst3 (IS21)          |
| ARGENE301956 | 1 | 0 | 0 | 0 | 0 | 1 | 0 | 0 | 2 | ISPpa29 (IS110)        |
| ARGENE300797 | 0 | 0 | 0 | 0 | 0 | 2 | 0 | 0 | 2 | ISUnCu5 (IS4)          |
| ARGENE300795 | 0 | 0 | 0 | 0 | 1 | 1 | 0 | 0 | 2 | ISUnCu3 (IS21)         |
| ARGENE301048 | 0 | 0 | 0 | 0 | 0 | 0 | 0 | 2 | 2 | ISCARN22 (IS66)        |
| ARGENE301122 | 0 | 1 | 0 | 0 | 0 | 1 | 0 | 0 | 2 | ISDde1 (IS5)           |
| ARGENE300947 | 0 | 0 | 0 | 0 | 2 | 0 | 0 | 0 | 2 | ISAzsp1 (IS3)          |
| ARGENE300551 | 0 | 0 | 0 | 2 | 0 | 0 | 0 | 0 | 2 | ISGdi17 (IS21)         |
| ARGENE300883 | 0 | 1 | 0 | 0 | 0 | 0 | 0 | 1 | 2 | ISCARN10 (IS200/IS605) |
| ARGENE302141 | 0 | 0 | 0 | 1 | 0 | 0 | 0 | 1 | 2 | ISRso16 (IS3)          |
| ARGENE302143 | 0 | 0 | 0 | 0 | 0 | 0 | 0 | 2 | 2 | ISRso11 (IS3)          |
| ARGENE302562 | 1 | 0 | 0 | 0 | 0 | 0 | 0 | 1 | 2 | ISPPu19 (IS66)         |
| ARGENE302028 | 0 | 0 | 0 | 0 | 0 | 1 | 1 | 0 | 2 | ISCARN97 (IS110)       |
| ARGENE301914 | 0 | 0 | 0 | 0 | 0 | 2 | 0 | 0 | 2 | IS53 (IS21)            |
| ARGENE301714 | 0 | 0 | 0 | 0 | 0 | 0 | 0 | 2 | 2 | ISXo7 (IS630)          |
| ARGENE301717 | 0 | 0 | 0 | 0 | 2 | 0 | 0 | 0 | 2 | ISPpa2 (IS5)           |
| ARGENE301712 | 0 | 0 | 0 | 1 | 1 | 0 | 0 | 0 | 2 | ISPpa5 (IS66)          |

|              |   |   |   |   |   |   |   |   |               |                       |
|--------------|---|---|---|---|---|---|---|---|---------------|-----------------------|
| ARGENE301927 | 1 | 1 | 0 | 0 | 0 | 0 | 0 | 0 | 2             | ISRme4 (IS21)         |
| ARGENE301279 | 0 | 0 | 0 | 1 | 0 | 1 | 0 | 0 | 2             | IS4351 (IS30)         |
| ARGENE301493 | 0 | 0 | 1 | 0 | 0 | 1 | 0 | 0 | 2             | ISMex39 (IS21)        |
| ARGENE301933 | 0 | 1 | 0 | 0 | 0 | 1 | 0 | 0 | 2             | ISBthe1 (IS4)         |
| ARGENE300289 | 0 | 1 | 0 | 0 | 0 | 0 | 1 | 0 | 2             | ISAzo16 (IS21)        |
| ARGENE300411 | 1 | 0 | 0 | 1 | 0 | 0 | 0 | 0 | 2             | ISMca3 (IS3)          |
| ARGENE301449 | 1 | 0 | 0 | 0 | 1 | 0 | 0 | 0 | 2             | ISAzo26 (IS91)        |
| ARGENE302438 | 1 | 0 | 0 | 0 | 1 | 0 | 0 | 0 | 2             | ISVsp19 (IS1380)      |
| ARGENE300253 | 0 | 0 | 1 | 1 | 0 | 0 | 0 | 0 | 2             | ISRme10 (IS30)        |
| ARGENE300671 | 0 | 0 | 0 | 0 | 0 | 0 | 0 | 2 | ISNieu3 (IS3) |                       |
| ARGENE100008 | 0 | 0 | 0 | 1 | 0 | 0 | 0 | 0 | 1             | intl2                 |
| ARGENE300920 | 0 | 0 | 0 | 0 | 0 | 1 | 0 | 0 | 1             | ISDha10 (IS110)       |
| ARGENE302426 | 0 | 0 | 0 | 0 | 0 | 1 | 0 | 0 | 1             | ISAli4 (IS3)          |
| ARGENE302421 | 0 | 1 | 0 | 0 | 0 | 0 | 0 | 0 | 1             | ISAli2 (IS630)        |
| ARGENE300245 | 1 | 0 | 0 | 0 | 0 | 0 | 0 | 0 | 1             | IS1491 (IS21)         |
| ARGENE300391 | 0 | 1 | 0 | 0 | 0 | 0 | 0 | 0 | 1             | IS883 (IS66)          |
| ARGENE300669 | 0 | 0 | 0 | 0 | 0 | 0 | 0 | 1 | 1             | ISThsp19 (IS21)       |
| ARGENE300663 | 0 | 0 | 0 | 0 | 0 | 1 | 0 | 0 | 1             | ISThsp10 (IS21)       |
| ARGENE301281 | 0 | 1 | 0 | 0 | 0 | 0 | 0 | 0 | 1             | ISAzo19 (IS66)        |
| ARGENE301287 | 0 | 0 | 0 | 1 | 0 | 0 | 0 | 0 | 1             | ISAzo15 (IS66)        |
| ARGENE301285 | 0 | 0 | 0 | 0 | 0 | 0 | 0 | 1 | 1             | ISGur11 (IS481)       |
| ARGENE301624 | 0 | 0 | 0 | 0 | 0 | 1 | 0 | 0 | 1             | ISAcma31 (IS630)      |
| ARGENE301754 | 0 | 0 | 0 | 0 | 0 | 1 | 0 | 0 | 1             | ISPa32 (IS3)          |
| ARGENE301759 | 1 | 0 | 0 | 0 | 0 | 0 | 0 | 0 | 1             | ISNisp1 (IS3)         |
| ARGENE300933 | 0 | 1 | 0 | 0 | 0 | 0 | 0 | 0 | 1             | ISDha13 (IS200/IS605) |
| ARGENE300506 | 0 | 0 | 0 | 1 | 0 | 0 | 0 | 0 | 1             | ISCce1 (IS481)        |
| ARGENE300501 | 0 | 0 | 0 | 1 | 0 | 0 | 0 | 0 | 1             | ISSpwi1 (IS3)         |
| ARGENE302412 | 0 | 0 | 0 | 0 | 1 | 0 | 0 | 0 | 1             | ISTesp1 (IS3)         |
| ARGENE301900 | 0 | 0 | 0 | 0 | 0 | 1 | 0 | 0 | 1             | ISCausp1 (IS3)        |
| ARGENE301958 | 1 | 0 | 0 | 0 | 0 | 0 | 0 | 0 | 1             | ISPa27 (IS256)        |
| ARGENE302287 | 0 | 1 | 0 | 0 | 0 | 0 | 0 | 0 | 1             | IS53K (IS21)          |
| ARGENE302284 | 0 | 0 | 0 | 0 | 1 | 0 | 0 | 0 | 1             | ISAzo5 (IS4)          |
| ARGENE300015 | 0 | 0 | 0 | 0 | 1 | 0 | 0 | 0 | 1             | ISThsp9 (Tn3)         |
| ARGENE300651 | 0 | 0 | 0 | 1 | 0 | 0 | 0 | 0 | 1             | ISMex22 (Tn3)         |
| ARGENE301749 | 0 | 0 | 0 | 0 | 0 | 0 | 0 | 1 | 1             | ISSStma5 (IS3)        |
| ARGENE301406 | 0 | 0 | 0 | 0 | 0 | 0 | 0 | 1 | 1             | ISCARN47 (IS256)      |
| ARGENE302248 | 0 | 0 | 0 | 1 | 0 | 0 | 0 | 0 | 1             | ISAs2 (IS30)          |
| ARGENE302241 | 0 | 0 | 0 | 0 | 0 | 0 | 0 | 1 | 1             | ISAzo31 (IS5)         |
| ARGENE301644 | 1 | 0 | 0 | 0 | 0 | 0 | 0 | 0 | 1             | ISAzo34 (IS256)       |
| ARGENE300649 | 0 | 0 | 0 | 1 | 0 | 0 | 0 | 0 | 1             | ISSfr1 (IS110)        |
| ARGENE301510 | 0 | 0 | 0 | 0 | 1 | 0 | 0 | 0 | 1             | IS1087 (IS3)          |
| ARGENE301353 | 0 | 0 | 0 | 0 | 0 | 1 | 0 | 0 | 1             | ISMsm12 (IS1380)      |

|              |   |   |   |   |   |   |   |   |   |                         |
|--------------|---|---|---|---|---|---|---|---|---|-------------------------|
| ARGENE300734 | 1 | 0 | 0 | 0 | 0 | 0 | 0 | 0 | 1 | ISCsp1 (IS256)          |
| ARGENE300917 | 0 | 0 | 0 | 0 | 1 | 0 | 0 | 0 | 1 | ISMdi13 (IS256)         |
| ARGENE300912 | 0 | 1 | 0 | 0 | 0 | 0 | 0 | 0 | 1 | ISWsu1 (IS3)            |
| ARGENE301994 | 0 | 0 | 0 | 1 | 0 | 0 | 0 | 0 | 1 | ISRta2 (IS256)          |
| ARGENE301491 | 0 | 0 | 0 | 0 | 1 | 0 | 0 | 0 | 1 | ISYps3 (Tn3)            |
| ARGENE302273 | 0 | 0 | 1 | 0 | 0 | 0 | 0 | 0 | 1 | IS1353 (IS3)            |
| ARGENE302277 | 0 | 0 | 0 | 1 | 0 | 0 | 0 | 0 | 1 | IS1356 (IS256)          |
| ARGENE302275 | 0 | 0 | 0 | 0 | 1 | 0 | 0 | 0 | 1 | IS1355 (IS5)            |
| ARGENE302505 | 1 | 0 | 0 | 0 | 0 | 0 | 0 | 0 | 1 | ISPosp5 (IS3)           |
| ARGENE302506 | 0 | 0 | 0 | 0 | 0 | 0 | 0 | 1 | 1 | ISPosp4 (IS4)           |
| ARGENE300354 | 0 | 0 | 0 | 0 | 1 | 0 | 0 | 0 | 1 | ISRsp3 (IS21)           |
| ARGENE300586 | 0 | 0 | 0 | 1 | 0 | 0 | 0 | 0 | 1 | IS1236 (IS3)            |
| ARGENE300369 | 0 | 0 | 0 | 0 | 0 | 0 | 0 | 1 | 1 | ISDsp1 (IS3)            |
| ARGENE301410 | 0 | 0 | 0 | 0 | 0 | 1 | 0 | 0 | 1 | ISAzca2 (IS66)          |
| ARGENE301984 | 0 | 0 | 0 | 1 | 0 | 0 | 0 | 0 | 1 | ISCARN78 (IS21)         |
| ARGENE301509 | 0 | 1 | 0 | 0 | 0 | 0 | 0 | 0 | 1 | ISJsp2 (IS5)            |
| ARGENE301504 | 0 | 1 | 0 | 0 | 0 | 0 | 0 | 0 | 1 | ISEnfa200 (IS200/IS605) |
| ARGENE302088 | 0 | 0 | 0 | 0 | 1 | 0 | 0 | 0 | 1 | ISRM13 (IS5)            |
| ARGENE302264 | 0 | 0 | 0 | 1 | 0 | 0 | 0 | 0 | 1 | IS693 (IS66)            |
| ARGENE302263 | 0 | 0 | 1 | 0 | 0 | 0 | 0 | 0 | 1 | ISMaq1 (IS3)            |
| ARGENE300838 | 0 | 0 | 0 | 0 | 0 | 0 | 0 | 1 | 1 | ISP8 (IS5)              |
| ARGENE302516 | 0 | 0 | 0 | 0 | 0 | 0 | 0 | 1 | 1 | ISNeu2 (IS982)          |
| ARGENE300542 | 0 | 0 | 0 | 1 | 0 | 0 | 0 | 0 | 1 | ISAac2 (IS5)            |
| ARGENE300545 | 0 | 0 | 0 | 0 | 0 | 1 | 0 | 0 | 1 | IS1051 (IS5)            |
| ARGENE300596 | 0 | 0 | 0 | 0 | 1 | 0 | 0 | 0 | 1 | ISPre4 (IS21)           |
| ARGENE300372 | 0 | 0 | 0 | 0 | 0 | 0 | 0 | 1 | 1 | ISDsp2 (IS3)            |
| ARGENE300684 | 0 | 0 | 0 | 0 | 1 | 0 | 0 | 0 | 1 | ISSso1 (IS110)          |
| ARGENE301376 | 0 | 0 | 0 | 1 | 0 | 0 | 0 | 0 | 1 | ISNmo3 (IS481)          |
| ARGENE301404 | 0 | 0 | 0 | 0 | 0 | 0 | 0 | 1 | 1 | ISCARN45 (IS256)        |
| ARGENE301401 | 0 | 0 | 0 | 0 | 0 | 1 | 0 | 0 | 1 | ISCARN48 (IS66)         |
| ARGENE301403 | 0 | 0 | 0 | 0 | 0 | 0 | 0 | 1 | 1 | ISCARN44 (IS630)        |
| ARGENE302071 | 0 | 0 | 0 | 1 | 0 | 0 | 0 | 0 | 1 | ISMex7 (IS3)            |
| ARGENE302078 | 0 | 0 | 0 | 0 | 1 | 0 | 0 | 0 | 1 | ISXca1 (IS3)            |
| ARGENE301883 | 0 | 1 | 0 | 0 | 0 | 0 | 0 | 0 | 1 | ISMex14 (IS256)         |
| ARGENE301885 | 0 | 0 | 0 | 0 | 0 | 1 | 0 | 0 | 1 | ISMex12 (IS110)         |
| ARGENE301888 | 0 | 0 | 1 | 0 | 0 | 0 | 0 | 0 | 1 | ISMex11 (IS3)           |
| ARGENE302326 | 0 | 0 | 0 | 0 | 0 | 1 | 0 | 0 | 1 | ISPpu21 (IS5)           |
| ARGENE302452 | 1 | 0 | 0 | 0 | 0 | 0 | 0 | 0 | 1 | IS1383 (IS110)          |
| ARGENE302450 | 0 | 0 | 0 | 0 | 0 | 1 | 0 | 0 | 1 | IS1384 (IS5)            |
| ARGENE300564 | 0 | 0 | 0 | 1 | 0 | 0 | 0 | 0 | 1 | ISRde2 (IS3)            |
| ARGENE300567 | 0 | 0 | 0 | 0 | 1 | 0 | 0 | 0 | 1 | ISSStma10 (IS630)       |
| ARGENE300163 | 0 | 0 | 0 | 0 | 0 | 0 | 0 | 1 | 1 | ISAd3 (IS3)             |

|              |   |   |   |   |   |   |   |   |   |                      |
|--------------|---|---|---|---|---|---|---|---|---|----------------------|
| ARGENE300762 | 0 | 1 | 0 | 0 | 0 | 0 | 0 | 0 | 1 | ISGNB1-1 (IS5)       |
| ARGENE300784 | 0 | 0 | 0 | 1 | 0 | 0 | 0 | 0 | 1 | IS1133 (IS3)         |
| ARGENE300785 | 0 | 0 | 1 | 0 | 0 | 0 | 0 | 0 | 1 | IS1132 (IS256)       |
| ARGENE302065 | 1 | 0 | 0 | 0 | 0 | 0 | 0 | 0 | 1 | ISAbo1 (IS3)         |
| ARGENE302068 | 0 | 0 | 0 | 0 | 0 | 0 | 1 | 0 | 1 | ISPlu2 (IS200/IS605) |
| ARGENE301896 | 0 | 0 | 0 | 1 | 0 | 0 | 0 | 0 | 1 | IS1240 (IS3)         |
| ARGENE301898 | 0 | 1 | 0 | 0 | 0 | 0 | 0 | 0 | 1 | IS1246 (IS5)         |
| ARGENE301789 | 0 | 0 | 0 | 0 | 0 | 0 | 1 | 0 | 1 | ISYen2B (IS21)       |
| ARGENE302193 | 0 | 0 | 0 | 0 | 0 | 1 | 0 | 0 | 1 | ISApr9 (IS1380)      |
| ARGENE302195 | 0 | 0 | 0 | 0 | 0 | 1 | 0 | 0 | 1 | ISApr8 (IS1380)      |
| ARGENE300577 | 0 | 0 | 0 | 0 | 0 | 1 | 0 | 0 | 1 | ISAs1 (ISAs1)        |
| ARGENE302293 | 0 | 0 | 0 | 1 | 0 | 0 | 0 | 0 | 1 | ISRasp1 (IS3)        |
| ARGENE300312 | 0 | 0 | 0 | 0 | 0 | 1 | 0 | 0 | 1 | ISVme1 (IS66)        |
| ARGENE301318 | 0 | 0 | 0 | 0 | 0 | 1 | 0 | 0 | 1 | IS1474 (IS21)        |
| ARGENE300779 | 0 | 0 | 0 | 0 | 1 | 0 | 0 | 0 | 1 | ISPst5 (IS5)         |
| ARGENE300950 | 0 | 0 | 0 | 0 | 0 | 1 | 0 | 0 | 1 | ISBusp2 (IS5)        |
| ARGENE301227 | 0 | 0 | 0 | 1 | 0 | 0 | 0 | 0 | 1 | ISSusp2 (IS3)        |
| ARGENE301553 | 1 | 0 | 0 | 0 | 0 | 0 | 0 | 0 | 1 | ISGme3 (IS5)         |
| ARGENE302052 | 0 | 0 | 0 | 0 | 1 | 0 | 0 | 0 | 1 | ISPsy17 (IS256)      |
| ARGENE302051 | 0 | 0 | 0 | 1 | 0 | 0 | 0 | 0 | 1 | ISAcma13 (IS3)       |
| ARGENE301049 | 0 | 0 | 0 | 0 | 0 | 0 | 0 | 1 | 1 | ISCARN20 (IS110)     |
| ARGENE302239 | 0 | 0 | 0 | 0 | 0 | 1 | 0 | 0 | 1 | ISThi1 (IS5)         |
| ARGENE302231 | 1 | 0 | 0 | 0 | 0 | 0 | 0 | 0 | 1 | ISPsy24 (IS3)        |
| ARGENE302540 | 0 | 1 | 0 | 0 | 0 | 0 | 0 | 0 | 1 | ISCARN114 (IS30)     |
| ARGENE300094 | 0 | 0 | 0 | 0 | 0 | 1 | 0 | 0 | 1 | IS1395 (IS256)       |
| ARGENE300097 | 1 | 0 | 0 | 0 | 0 | 0 | 0 | 0 | 1 | IS1396 (ISL3)        |
| ARGENE300548 | 1 | 0 | 0 | 0 | 0 | 0 | 0 | 0 | 1 | ISGdi10 (IS481)      |
| ARGENE300436 | 0 | 0 | 0 | 0 | 0 | 1 | 0 | 0 | 1 | ISSpu8 (IS630)       |
| ARGENE300327 | 0 | 0 | 0 | 0 | 0 | 0 | 1 | 0 | 1 | ISOba3 (IS1)         |
| ARGENE301051 | 0 | 0 | 0 | 0 | 0 | 0 | 1 | 0 | 1 | IS30D (IS30)         |
| ARGENE300949 | 0 | 0 | 0 | 1 | 0 | 0 | 0 | 0 | 1 | ISBusp1 (Tn3)        |
| ARGENE300414 | 0 | 0 | 1 | 0 | 0 | 0 | 0 | 0 | 1 | ISMca4 (IS3)         |
| ARGENE300417 | 0 | 0 | 1 | 0 | 0 | 0 | 0 | 0 | 1 | ISAz041 (IS5)        |
| ARGENE302040 | 0 | 0 | 0 | 0 | 0 | 1 | 0 | 0 | 1 | ISHne4 (IS110)       |
| ARGENE302229 | 0 | 0 | 1 | 0 | 0 | 0 | 0 | 0 | 1 | ISPsy20 (IS21)       |
| ARGENE302225 | 0 | 1 | 0 | 0 | 0 | 0 | 0 | 0 | 1 | ISPsy28 (IS3)        |
| ARGENE301836 | 1 | 0 | 0 | 0 | 0 | 0 | 0 | 0 | 1 | ISSpo4 (IS5)         |
| ARGENE300159 | 0 | 0 | 0 | 0 | 0 | 1 | 0 | 0 | 1 | ISXo17 (IS3)         |
| ARGENE301332 | 1 | 0 | 0 | 0 | 0 | 0 | 0 | 0 | 1 | IS1193D (ISL3)       |
| ARGENE301330 | 0 | 0 | 0 | 0 | 1 | 0 | 0 | 0 | 1 | ISMex29 (IS110)      |
| ARGENE300552 | 1 | 0 | 0 | 0 | 0 | 0 | 0 | 0 | 1 | ISGdi14 (IS3)        |
| ARGENE301680 | 0 | 0 | 0 | 1 | 0 | 0 | 0 | 0 | 1 | ISLxc1 (IS21)        |

|              |   |   |   |   |   |   |   |   |   |                       |
|--------------|---|---|---|---|---|---|---|---|---|-----------------------|
| ARGENE301201 | 0 | 0 | 0 | 0 | 0 | 0 | 0 | 1 | 1 | ISMsi5 (IS3)          |
| ARGENE300337 | 0 | 0 | 0 | 0 | 1 | 0 | 0 | 0 | 1 | ISBJ4 (IS110)         |
| ARGENE301069 | 1 | 0 | 0 | 0 | 0 | 0 | 0 | 0 | 1 | ISPa16 (IS5)          |
| ARGENE301844 | 0 | 0 | 0 | 0 | 0 | 1 | 0 | 0 | 1 | ISAav1 (IS21)         |
| ARGENE301849 | 0 | 0 | 0 | 0 | 0 | 0 | 0 | 1 | 1 | ISCARN80 (IS110)      |
| ARGENE301448 | 0 | 0 | 0 | 0 | 0 | 0 | 1 | 0 | 1 | ISAzo27 (IS5)         |
| ARGENE302360 | 0 | 0 | 0 | 0 | 0 | 0 | 0 | 1 | 1 | ISBcen3 (IS110)       |
| ARGENE300439 | 0 | 1 | 0 | 0 | 0 | 0 | 0 | 0 | 1 | ISHar4 (IS30)         |
| ARGENE301825 | 1 | 0 | 0 | 0 | 0 | 0 | 0 | 0 | 1 | ISGsu1 (IS4)          |
| ARGENE301821 | 0 | 0 | 0 | 1 | 0 | 0 | 0 | 0 | 1 | ISRusp1 (IS5)         |
| ARGENE300639 | 0 | 0 | 0 | 0 | 0 | 0 | 0 | 1 | 1 | ISMrsp5 (IS66)        |
| ARGENE301320 | 0 | 0 | 0 | 1 | 0 | 0 | 0 | 0 | 1 | ISMex27 (IS21)        |
| ARGENE300527 | 0 | 0 | 0 | 0 | 0 | 0 | 1 | 0 | 1 | ISMsm2 (IS630)        |
| ARGENE301692 | 0 | 0 | 0 | 1 | 0 | 0 | 0 | 0 | 1 | IS1326 (IS21)         |
| ARGENE301852 | 0 | 0 | 0 | 0 | 0 | 1 | 0 | 0 | 1 | IS66-1 (IS66)         |
| ARGENE301613 | 0 | 0 | 0 | 1 | 0 | 0 | 0 | 0 | 1 | ISSod5 (IS256)        |
| ARGENE301451 | 0 | 0 | 0 | 0 | 0 | 1 | 0 | 0 | 1 | ISAzo20 (IS200/IS605) |
| ARGENE301102 | 0 | 0 | 0 | 0 | 1 | 0 | 0 | 0 | 1 | ISGme2 (IS4)          |
| ARGENE300743 | 0 | 0 | 0 | 0 | 0 | 1 | 0 | 0 | 1 | IS640 (IS21)          |
| ARGENE300744 | 0 | 0 | 0 | 1 | 0 | 0 | 0 | 0 | 1 | IS1021 (IS5)          |
| ARGENE301133 | 0 | 0 | 0 | 0 | 1 | 0 | 0 | 0 | 1 | IS1F (IS1)            |
| ARGENE301861 | 0 | 0 | 0 | 0 | 0 | 1 | 0 | 0 | 1 | IS1403 (IS3)          |
| ARGENE300195 | 0 | 0 | 0 | 0 | 0 | 0 | 1 | 0 | 1 | ISRso9 (IS5)          |
| ARGENE300198 | 0 | 0 | 0 | 0 | 1 | 0 | 0 | 0 | 1 | ISRso5 (IS630)        |
| ARGENE300440 | 0 | 0 | 0 | 0 | 0 | 0 | 0 | 1 | 1 | ISHar7 (IS3)          |
| ARGENE301912 | 0 | 0 | 0 | 0 | 1 | 0 | 0 | 0 | 1 | ISVch3 (IS21)         |
| ARGENE301668 | 0 | 0 | 0 | 1 | 0 | 0 | 0 | 0 | 1 | IS1413 (IS256)        |
| ARGENE301669 | 1 | 0 | 0 | 0 | 0 | 0 | 0 | 0 | 1 | IS1411 (ISL3)         |
| ARGENE301267 | 0 | 0 | 0 | 1 | 0 | 0 | 0 | 0 | 1 | ISGur15 (IS21)        |
| ARGENE301829 | 0 | 0 | 0 | 0 | 0 | 0 | 1 | 0 | 1 | ISGsu4 (IS110)        |
| ARGENE300846 | 0 | 0 | 0 | 0 | 0 | 1 | 0 | 0 | 1 | ISRm7 (IS3)           |
| ARGENE300999 | 0 | 0 | 0 | 0 | 1 | 0 | 0 | 0 | 1 | IS222 (IS3)           |
| ARGENE302161 | 0 | 0 | 0 | 0 | 0 | 1 | 0 | 0 | 1 | ISPepr5 (IS21)        |
| ARGENE301713 | 0 | 0 | 0 | 0 | 0 | 0 | 0 | 1 | 1 | ISPPa4 (IS5)          |
| ARGENE302347 | 0 | 0 | 0 | 0 | 1 | 0 | 0 | 0 | 1 | ISCARN33 (IS5)        |
| ARGENE302342 | 0 | 1 | 0 | 0 | 0 | 0 | 0 | 0 | 1 | ISAAu3 (IS5)          |
| ARGENE301146 | 0 | 0 | 0 | 1 | 0 | 0 | 0 | 0 | 1 | IS17 (IS5)            |
| ARGENE301926 | 0 | 0 | 0 | 0 | 1 | 0 | 0 | 0 | 1 | ISRme1 (IS5)          |
| ARGENE301347 | 1 | 0 | 0 | 0 | 0 | 0 | 0 | 0 | 1 | IS-LL6 (IS3)          |
| ARGENE300610 | 1 | 0 | 0 | 0 | 0 | 0 | 0 | 0 | 1 | ISABa2 (IS3)          |
| ARGENE300616 | 0 | 0 | 0 | 0 | 0 | 0 | 0 | 1 | 1 | ISXc5 (Tn3)           |
| ARGENE300508 | 1 | 0 | 0 | 0 | 0 | 0 | 0 | 0 | 1 | ISThsp21 (IS5)        |

|              |   |   |   |   |   |   |   |   |   |                       |
|--------------|---|---|---|---|---|---|---|---|---|-----------------------|
| ARGENE301676 | 0 | 0 | 0 | 1 | 0 | 0 | 0 | 0 | 1 | ISSau1 (IS30)         |
| ARGENE301273 | 0 | 0 | 0 | 0 | 0 | 1 | 0 | 0 | 1 | ISAc1 (IS3)           |
| ARGENE300871 | 1 | 0 | 0 | 0 | 0 | 0 | 0 | 0 | 1 | ISBcen17 (IS3)        |
| ARGENE300876 | 0 | 0 | 0 | 0 | 1 | 0 | 0 | 0 | 1 | ISBcen18 (IS256)      |
| ARGENE300875 | 0 | 0 | 0 | 0 | 0 | 0 | 1 | 0 | 1 | ISBcen19 (IS66)       |
| ARGENE301474 | 1 | 0 | 0 | 0 | 0 | 0 | 0 | 0 | 1 | ISNmu3 (IS3)          |
| ARGENE300478 | 1 | 0 | 0 | 0 | 0 | 0 | 0 | 0 | 1 | ISAtu3 (IS3)          |
| ARGENE301708 | 0 | 0 | 0 | 1 | 0 | 0 | 0 | 0 | 1 | ISPca1 (IS4)          |
| ARGENE301492 | 0 | 0 | 0 | 0 | 0 | 0 | 0 | 1 | 1 | IS1311 (IS256)        |
| ARGENE302007 | 0 | 0 | 0 | 0 | 0 | 1 | 0 | 0 | 1 | IS1X1 (IS1)           |
| ARGENE301202 | 0 | 0 | 0 | 0 | 0 | 1 | 0 | 0 | 1 | ISMsi4 (IS3)          |
| ARGENE301200 | 0 | 0 | 1 | 0 | 0 | 0 | 0 | 0 | 1 | ISMsi2 (IS3)          |
| ARGENE301497 | 0 | 0 | 0 | 1 | 0 | 0 | 0 | 0 | 1 | ISSce1 (IS1)          |
| ARGENE300334 | 0 | 0 | 0 | 0 | 0 | 1 | 0 | 0 | 1 | ISR1 (IS3)            |
| ARGENE302167 | 0 | 0 | 0 | 0 | 0 | 1 | 0 | 0 | 1 | ISRssp8 (IS1380)      |
| ARGENE301220 | 1 | 0 | 0 | 0 | 0 | 0 | 0 | 0 | 1 | ISHha1 (IS3)          |
| ARGENE301638 | 0 | 0 | 0 | 0 | 0 | 0 | 0 | 1 | 1 | ISBmu2 (IS5)          |
| ARGENE301935 | 0 | 0 | 0 | 0 | 0 | 1 | 0 | 0 | 1 | ISCph2 (IS4)          |
| ARGENE302337 | 0 | 0 | 0 | 0 | 0 | 0 | 1 | 0 | 1 | ISMca2 (IS3)          |
| ARGENE300515 | 0 | 0 | 0 | 0 | 1 | 0 | 0 | 0 | 1 | ISBxe3 (IS481)        |
| ARGENE300609 | 0 | 0 | 0 | 1 | 0 | 0 | 0 | 0 | 1 | ISAb1 (IS4)           |
| ARGENE300601 | 0 | 0 | 0 | 0 | 0 | 1 | 0 | 0 | 1 | ISGur4 (IS4)          |
| ARGENE300603 | 0 | 0 | 0 | 1 | 0 | 0 | 0 | 0 | 1 | ISGur6 (IS3)          |
| ARGENE300602 | 0 | 0 | 0 | 0 | 0 | 0 | 1 | 0 | 1 | ISCod1 (IS3)          |
| ARGENE300216 | 0 | 0 | 0 | 0 | 0 | 0 | 1 | 0 | 1 | ISCARN6 (IS200/IS605) |
| ARGENE301735 | 0 | 0 | 0 | 1 | 0 | 0 | 0 | 0 | 1 | ISRosp2 (IS3)         |
| ARGENE300346 | 1 | 0 | 0 | 0 | 0 | 0 | 0 | 0 | 1 | ISPen2 (IS3)          |
| ARGENE302299 | 0 | 0 | 0 | 0 | 0 | 1 | 0 | 0 | 1 | ISRso20 (IS3)         |
| ARGENE302100 | 0 | 0 | 0 | 0 | 1 | 0 | 0 | 0 | 1 | ISAnsp11 (IS3)        |
| ARGENE300258 | 0 | 0 | 0 | 0 | 1 | 0 | 0 | 0 | 1 | ISRme16 (IS5)         |
| ARGENE301485 | 0 | 0 | 0 | 0 | 0 | 0 | 0 | 1 | 1 | ISMex31 (IS110)       |
| ARGENE300257 | 1 | 0 | 0 | 0 | 0 | 0 | 0 | 0 | 1 | ISRme15 (IS3)         |
| ARGENE302434 | 0 | 0 | 0 | 1 | 0 | 0 | 0 | 0 | 1 | ISRpa2 (IS3)          |
| ARGENE300071 | 0 | 0 | 1 | 0 | 0 | 0 | 0 | 0 | 1 | ISPsp3 (IS5)          |
| ARGENE300076 | 0 | 0 | 0 | 0 | 1 | 0 | 0 | 0 | 1 | ISBlma7 (ISAs1)       |
| ARGENE300704 | 0 | 0 | 0 | 0 | 0 | 1 | 0 | 0 | 1 | ISMt1 (IS5)           |
| ARGENE300252 | 0 | 0 | 0 | 1 | 0 | 0 | 0 | 0 | 1 | ISSOR (IS4)           |
| ARGENE300708 | 0 | 0 | 0 | 0 | 0 | 1 | 0 | 0 | 1 | ISAp1 (IS4)           |
| ARGENE300670 | 0 | 0 | 1 | 0 | 0 | 0 | 0 | 0 | 1 | ISNieu2 (IS3)         |

<sup>a</sup>It is known that the ISVsa3 insertion sequence contain an ISCR2 transposase and ARGENE400003 and ARGENE302403 may therefore correspond to the same mobile elements. Note, however, that the ISCR2 transposase (ARGENE400003) is detected based on the presence of the peptide sequence of the transposase and is therefore likely to represent other configurations than the ISVsa3 insertion sequence.
