# Supplementary material for: Pyrosequencing of Antibiotic-Contaminated River Sediments Reveals High Levels of Resistance and Gene Transfer Elements
Source: PubMed Central journal article supplement (PMC3040208; doi:10.1371/journal.pone.0017038), 2011-02-16
Supplement: pone.0017038.s022.pdf [file pone.0017038.s022.pdf]

**Table S14**

| <b>GeneFamily</b>   | <b>Coefficient</b> | <b>AIC</b> | <b>P-value</b> | <b>FDR</b> | <b>Annotation</b>         |
|---------------------|--------------------|------------|----------------|------------|---------------------------|
| <b>ARGENE000142</b> | 4.19               | 40.97      | 0              | 0          | <i>sul2</i>               |
| <b>ARGENE000144</b> | 3.08               | 36.56      | 5.36E-59       | 7.95E-56   | aph6id ( <i>strA</i> )    |
| <b>ARGENE000034</b> | 3.99               | 34.12      | 5.88E-50       | 5.81E-47   | aph33ib ( <i>strB</i> )   |
| <b>ARGENE400003</b> | 3.18               | 50.57      | 8.65E-47       | 6.42E-44   | ISCR2<br>transposase      |
| <b>ARGENE200007</b> | -3.69              | 67.63      | 1.07E-19       | 6.36E-17   | <i>qnrD</i>               |
| <b>ARGENE100006</b> | 1.90               | 26.95      | 3.35E-12       | 1.58E-09   | <i>intI1</i>              |
| <b>ARGENE302403</b> | 3.35               | 107.73     | 2.01E-09       | 7.47E-07   | ISVsa3 (IS91)             |
| <b>ARGENE200006</b> | -3.46              | 17.41      | 1.93E-08       | 5.73E-06   | <i>qnrC</i>               |
| <b>ARGENE200008</b> | -22.11             | 13.20      | 9.91E-07       | 0.000267   | <i>qnrS</i>               |
| <b>ARGENE000107</b> | -21.03             | 16.08      | 2.58E-06       | 0.00059    | bl2_ges ( <i>blaGES</i> ) |
| <b>ARGENE000244</b> | -24.63             | 10.58      | 0.000124       | 0.02621    | ant3ia ( <i>aadA</i> )    |
