# Supplementary material for: Pyrosequencing of Antibiotic-Contaminated River Sediments Reveals High Levels of Resistance and Gene Transfer Elements
Source: PubMed Central journal article supplement (PMC3040208; doi:10.1371/journal.pone.0017038), 2011-02-16
Supplement: pone.0017038.s023.pdf [file pone.0017038.s023.pdf]

**Table S15**

| <b>GeneFamily</b>   | <b>Coefficient</b> | <b>AIC</b> | <b>P-value</b> | <b>FDR</b> | <b>Annotation</b>       |
|---------------------|--------------------|------------|----------------|------------|-------------------------|
| <b>ARGENE200007</b> | 20.19              | 62.24      | 4.29E-15       | 1.27E-11   | <i>qnrD</i>             |
| <b>ARGENE200006</b> | 24.27              | 12.57      | 7.86E-07       | 0.000583   | <i>qnrC</i>             |
| <b>ARGENE000142</b> | 22.27              | 14.05      | 7.86E-07       | 0.000583   | <i>sul2</i>             |
| <b>ARGENE200008</b> | 21.79              | 13.20      | 0.000102       | 0.060504   | <i>qnrS</i>             |
| <b>ARGENE000107</b> | 20.71              | 16.08      | 0.000189       | 0.080063   | <i>bl2_ges (blaGES)</i> |
