# Supplementary material for: Pyrosequencing of Antibiotic-Contaminated River Sediments Reveals High Levels of Resistance and Gene Transfer Elements
Source: PubMed Central journal article supplement (PMC3040208; doi:10.1371/journal.pone.0017038), 2011-02-16
Supplement: pone.0017038.s024.pdf [file pone.0017038.s024.pdf]

**Table S16**

| <b>GeneFamily</b>   | <b>Coefficient</b> | <b>AIC</b> | <b>P-value</b> | <b>FDR</b> | <b>Annotation</b>       |
|---------------------|--------------------|------------|----------------|------------|-------------------------|
| <b>ARGENE000142</b> | 26.46              | 30.91      | 0              | 0          | <i>sul2</i>             |
| <b>ARGENE000144</b> | 23.61              | 26.82      | 5.93E-62       | 8.80E-59   | aph6id ( <i>strB</i> )  |
| <b>ARGENE000034</b> | 23.31              | 26.08      | 2.07E-46       | 2.04E-43   | aph33ib ( <i>strA</i> ) |
| <b>ARGENE400003</b> | 4.89               | 49.11      | 7.44E-46       | 5.52E-43   | ISCR2<br>transposase    |
| <b>ARGENE100006</b> | 3.86               | 22.21      | 2.20E-16       | 1.30E-13   | <i>intl1</i>            |
| <b>ARGENE302403</b> | 18.57              | 104.61     | 1.92E-09       | 8.12E-07   | ISVsa3 (IS91)           |
