# Supplementary material for: Pyrosequencing of Antibiotic-Contaminated River Sediments Reveals High Levels of Resistance and Gene Transfer Elements
Source: PLoS One. 2011 Feb 16;6(2):e17038. doi: 10.1371/journal.pone.0017038 (PMC3040208; doi:10.1371/journal.pone.0017038)
Supplement: Table S4 — Results from the massively parallel pyrosequencing. % is given in relation to the total number of reads. (PDF) [file pone.0017038.s012.pdf]

**Table S4**

| <i>Site</i>                           | <i>Number of<br/>sequences reads</i> | <i>Total number of<br/>bases (million)</i> | <i>Average read<br/>length</i> | <i>GenBank<br/>nonredundant<br/>proteins</i> |
|---------------------------------------|--------------------------------------|--------------------------------------------|--------------------------------|----------------------------------------------|
| <i>Indian WWTP<br/>Downstream 1</i>   | 75,765                               | 27.68                                      | 365                            | 45.1%                                        |
| <i>Indian WWTP<br/>Downstream 2</i>   | 44,281                               | 16.16                                      | 365                            | 40.2%                                        |
| <i>Indian WWTP<br/>Downstream 3</i>   | 39,764                               | 14.27                                      | 359                            | 43.1%                                        |
| <i>Indian WWTP<br/>Discharge site</i> | 88,374                               | 32.81                                      | 371                            | 42.3%                                        |
| <i>Indian WWTP<br/>Upstream 1</i>     | 53,045                               | 19.10                                      | 360                            | 44.9%                                        |
| <i>Indian WWTP<br/>Upstream 2</i>     | 39,034                               | 13.78                                      | 353                            | 47.5%                                        |
| <i>Swedish WWTP<br/>Downstream</i>    | 37,895                               | 13.98                                      | 369                            | 35.7%                                        |
| <i>Swedish WWTP<br/>Upstream</i>      | 63,365                               | 22.91                                      | 362                            | 42.3%                                        |
| <i>Total</i>                          | 441,523                              | 160.69                                     | 364                            | 42.9%                                        |
